# Supplementary material
Source: publisher figshare collection journal article supplement (https://acs.figshare.com/ndownloader/files/4642807)

Supporting Information for:

**Concise Asymmetric Synthesis of (+)-CP-99,994 and (+)-L-733,060 via Efficient Construction of Homochiral *syn*-1,2-Diamines and *syn*-1,2-Amino Alcohols.**

Run-Hua Liu, Kai Fang, Bing Wang, Ming-Hua Xu, and Guo-Qiang Lin

*Department of Chemistry, Fudan University, 220 Handan Road, Shanghai 200433, Institutes of Biomedical Sciences, Fudan University, 138 Yixueyuan Road, Shanghai 200032, and Shanghai Institute of Organic Chemistry, Chinese Academy of Sciences, 354 Fenglin Road, Shanghai 200032, China.*

[wangbing@fudan.edu.cn](mailto:wangbing@fudan.edu.cn)

Table of Contents

|                                                                                                                                                                                                                         |            |
|-------------------------------------------------------------------------------------------------------------------------------------------------------------------------------------------------------------------------|------------|
| 1. General Information.                                                                                                                                                                                                 | .....S2    |
| 2. Experimental details for compounds <b>10</b> , <b>11</b> , <b>14</b> , <b>19</b> , <b>20</b> , <b>21</b> .                                                                                                           | .....S2-S4 |
| 3. <sup>1</sup> H and <sup>13</sup> C NMR spectra for compounds <b>5</b> , <b>9</b> , <b>10</b> , <b>11</b> , <b>12</b> , <b>1</b> , <b>14</b> , <b>15</b> , <b>16</b> , <b>19</b> , <b>20</b> , <b>21</b> , <b>2</b> . | ....S5-S30 |

**General Information.** All  $^1\text{H}$  NMR and  $^{13}\text{C}$  NMR spectra were recorded at ambient temperature in  $\text{CDCl}_3$  (93.94 kG,  $^1\text{H}$  400 MHz). Chemical shifts are reported in parts per million as follows: chemical shift, multiplicity (s = singlet, d = doublet, t = triplet, q = quartet, m = multiplet, br = broad), integration, and coupling constant. Optical rotations were recorded at 589 nm, and were reported as  $[\alpha]_D$  (concentration in grams/100 mL solvent). Melting points were uncorrected.

**Compound 10:**

To a cooled ( $0^\circ\text{C}$ ) solution of **9** (320 mg, 0.83 mmol) and  $\text{Et}_3\text{N}$  (0.17 mL, 1.25 mmol) in  $\text{CH}_2\text{Cl}_2$  (5 mL) was added dropwise  $\text{MsCl}$  (0.08 mL, 1.08 mmol), and the mixture was stirred at  $0^\circ\text{C}$  for 1h, diluted with  $\text{Et}_2\text{O}$  (30 mL), and washed successively with 1M  $\text{HCl}$ , saturated aq.  $\text{NaHCO}_3$  and brine, dried ( $\text{Na}_2\text{SO}_4$ ), filtered and concentrated under reduced pressure. The residue was dissolved in DMF (3 mL) under Ar, to this was added  $\text{NaN}_3$  (163 mg, 2.5 mmol) and the solution was stirred at  $65^\circ\text{C}$  overnight, cooled to rt, diluted with  $\text{Et}_2\text{O}$  (30 mL), and washed successively with water and brine, dried ( $\text{Na}_2\text{SO}_4$ ), filtered and concentrated under reduced pressure. The residue was purified by silica gel flash column chromatography ( $\text{EtOAc/Hexanes}=1/8$ ) to afford **10** (280 mg, 83%) as a white solid.

Mp.  $86\text{--}87^\circ\text{C}$ ;  $[\alpha]_D^{23}$   $-19.9$  ( $c$  1.32,  $\text{CHCl}_3$ );  $^1\text{H}$  NMR ( $\text{CDCl}_3$ )  $\delta$  7.419-7.25 (m, 5H), 5.26-5.17 (m, 1H), 4.87-4.75 (m, 1H), 4.07 (t, 2H,  $J = 6.0$  Hz), 3.71-3.60 (m, 1H), 1.92-1.72 (m, 2H), 1.70-1.59 (m, 2H), 1.43 (br s, 9H), 1.17 (s, 9H);  $^{13}\text{C}$  NMR ( $\text{CDCl}_3$ )  $\delta$  178.4, 155.3, 139.9, 128.8, 127.8, 126.4, 80.0, 67.3, 63.5, 57.1 (m), 38.7, 28.6, 28.3, 27.1, 25.5. ESI-MS  $m/z$  427.3 ( $\text{M} + \text{Na}^+$ ); HR-ESI-MS  $m/z$  Calcd for  $\text{C}_{21}\text{H}_{32}\text{N}_4\text{O}_4\text{Na}$  427.2321, Found 427.2349.

**Compound 11:**

To a solution of **10** (234 mg, 0.58 mmol) in MeOH (5 mL) under Ar was added 30% NaOMe in MeOH (0.21 mL, 1.16 mmol), the solution was stirred at rt for 4h, quenched by water, and extracted with  $\text{Et}_2\text{O}$  ( $3\times 15$  mL). The combined organic phase was washed with brine, dried ( $\text{Na}_2\text{SO}_4$ ), filtered and concentrated under reduced pressure to afford the crude product which was used in the next step without further purifications.

To a cooled ( $0^\circ\text{C}$ ) solution of the crude alcohol (180 mg) and  $\text{Et}_3\text{N}$  (0.11 mL, 0.84 mmol) in  $\text{CH}_2\text{Cl}_2$  (5 mL) was added dropwise  $\text{MsCl}$  (0.05 mL, 0.68 mmol), and the mixture was stirred at  $0^\circ\text{C}$  for 30min, diluted with  $\text{Et}_2\text{O}$  (30 mL), and washed successively with 1M  $\text{HCl}$ , saturated aq.  $\text{NaHCO}_3$  and brine, dried ( $\text{Na}_2\text{SO}_4$ ), filtered and concentrated under reduced pressure. The residue was dissolved in THF (5 mL) under Ar,  $\text{NaH}$  (66 mg, 60% dispersion in mineral oil, 1.65 mmol) was added and the mixture was stirred at rt for 6h, quenched by saturated aq.  $\text{NH}_4\text{Cl}$ , extracted with  $\text{Et}_2\text{O}$  ( $3\times 15$  mL), and washed with brine, dried ( $\text{Na}_2\text{SO}_4$ ), filtered and concentrated under reduced pressure. The residue was purified by silica gel flash column chromatography ( $\text{EtOAc/Hexanes}=1/16$ ) to afford **11** (139 mg, 80%) as a colorless oil.

$[\alpha]_D^{23}$   $+50.1$  ( $c$  1.26,  $\text{CHCl}_3$ );  $^1\text{H}$  NMR ( $\text{CDCl}_3$ )  $\delta$  7.45 (d, 2H,  $J = 7.9$  Hz), 7.37-7.22 (m, 3H), 5.47 (d, 1H,  $J = 5.5$  Hz), 3.99 (dd, 1H,  $J = 13.8, 3.6$  Hz), 3.96-3.85 (m, 1H); 2.89 (td, 1H,  $J = 13.2, 3.3$  Hz), 2.00-1.90 (m, 2H), 1.88-1.76 (m, 1H), 1.75-1.60 (m, 1H), 1.42 (s, 9H);  $^{13}\text{C}$  NMR ( $\text{CDCl}_3$ )  $\delta$  154.9, 137.7, 128.4, 128.2, 127.3, 80.2, 60.6, 56.5, 39.1, 28.3, 24.7, 23.9. ESI-MS  $m/z$  325.2 ( $\text{M} + \text{Na}^+$ ); HR-ESI-MS  $m/z$  Calcd for  $\text{C}_{16}\text{H}_{22}\text{N}_4\text{O}_2\text{Na}$  325.1640, Found 325.1644.

**Compound 14:**

To a solution of **5** (640 mg, 1.13 mmol) in MeOH (6 mL) was added a methanolic solution of HCl (2M, 3.4 mL) at rt, stirring was continued for 4h, and the solution was concentrated under reduced pressure. To a cooled (0°C) solution of the residue, 4-methoxybenzoic anhydride (525 mg, 1.84 mmol) and DMAP (10 mg) in CH<sub>2</sub>Cl<sub>2</sub> (15 mL) was added Et<sub>3</sub>N (0.76 mL, 5.2 mmol) dropwise over 10min, and the mixture was stirred at rt for 4h, diluted with CH<sub>2</sub>Cl<sub>2</sub> (30 mL), washed with saturated aq. NaHCO<sub>3</sub> and brine, dried (Na<sub>2</sub>SO<sub>4</sub>), filtered and concentrated under reduced pressure. The residue was purified by silica gel flash column chromatography (EtOAc/Hexanes=1/2) to afford **14** (607 mg, 88%) as a white solid.

Mp. 112–113 °C;  $[\alpha]_D^{23}$  -41.3 (*c* 1.04, CHCl<sub>3</sub>); <sup>1</sup>H NMR (CDCl<sub>3</sub>)  $\delta$  7.74 (d, 2H, *J* = 8.9 Hz), 7.39–7.25 (m, 5H), 7.11 (d, 1H, *J* = 8.9 Hz), 6.90 (d, 2H, *J* = 8.9 Hz), 5.11 (dd, 1H, *J* = 7.9, 3.7 Hz), 4.06–3.95 (m, 3H), 3.83 (s, 3H), 2.56 (br s, 1H), 1.85–1.63 (m, 2H), 1.58–1.49 (m, 1H), 1.28–1.15 (m, 1H), 1.12 (s, 9H); <sup>13</sup>C NMR (CDCl<sub>3</sub>)  $\delta$  178.7, 166.5, 162.2, 138.0, 128.9, 128.6, 127.9, 127.8, 126.4, 113.7, 73.6, 63.8, 58.2, 55.4, 38.7, 30.2, 27.1, 25.2. ESI-MS *m/z* 414.2 (M + H<sup>+</sup>); HR-ESI-MS *m/z* Calcd for C<sub>24</sub>H<sub>32</sub>NO<sub>5</sub> 414.2280, Found 414.2308.

**Compound 19:**

A suspension of **16** (315 mg, 0.79 mmol) and 20% Pd(OH)<sub>2</sub>/C (280 mg) in MeOH (5 mL) was stirred under H<sub>2</sub> atmosphere at rt for 2h, Boc<sub>2</sub>O (259 mg, 1.90 mmol) was then added, and the mixture was stirred for an additional 3h, filtered through celite, and concentrated under reduced pressure. The residue was purified by silica gel flash column chromatography (EtOAc/Hexanes=1/4) to afford **19** (236 mg, 79%) as a white solid.

Mp. 68–69 °C;  $[\alpha]_D^{23}$  +7.8 (*c* 0.97, CHCl<sub>3</sub>); <sup>1</sup>H NMR (CDCl<sub>3</sub>)  $\delta$  7.38–7.22 (m, 5H), 5.37 (br m, 1H), 4.64 (br m, 1H), 4.05 (t, 2H, *J* = 6.3 Hz), 3.84 (br m, 1H), 2.24 (br s, 1H), 1.90–1.48 (m, 4H), 1.42 (br s, 9H), 1.15 (s, 9H); <sup>13</sup>C NMR (CDCl<sub>3</sub>)  $\delta$  178.6, 156.1, 140.5, 128.8, 127.6, 126.5, 79.8, 74.8, 64.0, 58.9, 38.7, 30.2, 28.3, 27.1, 25.0. ESI-MS *m/z* 402.2 (M + Na<sup>+</sup>); HR-ESI-MS *m/z* Calcd for C<sub>21</sub>H<sub>33</sub>NO<sub>5</sub>Na 402.2256, Found 402.2237.

**Compound 20:**

To a cooled (0°C) solution of **19** (180 mg, 0.47 mmol), 3,5-(CF<sub>3</sub>)<sub>2</sub>C<sub>6</sub>H<sub>3</sub>CH<sub>2</sub>Br (284 mg, 0.94 mmol) and TBAI (260 mg, 0.71 mmol) in dry DMF under Ar was added NaH (20 mg, 60% dispersion in mineral oil, 0.50 mmol) in two portions over 5 min, stirring was continued for 30min, and the reaction was quenched with aq. NH<sub>4</sub>Cl followed by extraction with ether (3×15 mL). The combined organic layer was washed with water and brine, dried (Na<sub>2</sub>SO<sub>4</sub>), filtered and concentrated under reduced pressure. The residue was purified by silica gel flash column chromatography (EtOAc/Hexanes=1/12) to afford **20** (238 mg, 83%) as a white solid.

Mp. 61–62 °C;  $[\alpha]_D^{22}$  +14.1 (*c* 0.96, CHCl<sub>3</sub>); <sup>1</sup>H NMR (CDCl<sub>3</sub>)  $\delta$  7.76 (br s, 1H), 7.52 (br s, 2H), 7.40–7.25 (m, 5H), 5.38 (br m, 1H), 4.86 (br m, 1H), 4.50–4.11 (AB, 2H, *J*<sub>AB</sub> = 11.7 Hz), 4.10 (t, 1H, *J* = 6.3 Hz), 3.71 (br m, 1H), 1.84–1.62 (m, 4H), 1.42 (br s, 9H), 1.20 (s, 9H); <sup>13</sup>C NMR (CDCl<sub>3</sub>)  $\delta$  178.5, 155.6, 140.9, 140.4, 131.6 (q, *J* = 32.9 Hz), 128.5, 127.6, 127.4, 126.2, 123.2 (q, *J* = 271 Hz), 121.6, 83.5, 79.8, 71.3, 63.8, 56.4, 38.7, 29.7, 28.3, 27.2, 25.1. ESI-MS *m/z* 628.3 (M + Na<sup>+</sup>); HR-ESI-MS *m/z* Calcd for C<sub>30</sub>H<sub>37</sub>F<sub>6</sub>NO<sub>5</sub>Na 628.2474, Found 628.2426.

**Compound 21:**

To a solution of **20** (185 mg, 0.31 mmol) in MeOH (5 mL) under Ar was added 30% NaOMe in MeOH (0.11 mL, 0.62 mmol), the solution was stirred at rt for 4h, quenched by water, and extracted with Et<sub>2</sub>O (3×15 mL). The combined organic phase was washed with brine, dried (Na<sub>2</sub>SO<sub>4</sub>), filtered and concentrated under reduced pressure to afford the crude product which was used in the next step without further purification.

To a cooled (0°C) solution of the above crude alcohol and Et<sub>3</sub>N (0.07 mL, 0.5 mmol) in CH<sub>2</sub>Cl<sub>2</sub> (10 mL) was added dropwise MsCl (0.03 mL, 0.45 mmol), and the mixture was stirred at 0°C for 30min, diluted with Et<sub>2</sub>O (30 mL), and washed successively with 1M HCl, saturated aq. NaHCO<sub>3</sub> and brine, dried (Na<sub>2</sub>SO<sub>4</sub>), filtered and concentrated under reduced pressure. The residue was dissolved in THF (10 mL) under Ar, NaH (50 mg, 60% dispersion in mineral oil, 1.25 mmol) was added and the mixture was stirred at rt for 2 days, quenched by saturated aq. NH<sub>4</sub>Cl, extracted with Et<sub>2</sub>O (3×15 mL), and washed with brine, dried (Na<sub>2</sub>SO<sub>4</sub>), filtered and concentrated under reduced pressure. The residue was purified by silica gel flash column chromatography (EtOAc/Hexanes=1/16) to afford **21** (118 mg, 77%) as a colorless oil.

$[\alpha]_D^{22} +45.1$  (*c* 0.68, CHCl<sub>3</sub>); <sup>1</sup>H NMR (CDCl<sub>3</sub>)  $\delta$  7.77 (br s, 1H), 7.71 (br s, 2H), 7.56 (br s, 1H), 7.54 (br s, 1H), 7.36-7.23 (m, 3H), 5.69 (br s, 1H), 4.73 (AB, 2H,  $J_{AB}$  = 12.9 Hz), 3.95 (dd, 1H,  $J$  = 12.9, 3.6 Hz), 3.94-3.84 (m, 1H), 2.76 (ddd, 1H,  $J$  = 12.6, 12.6, 3.5 Hz), 2.04-1.94 (m, 2H), 1.78-1.58 (m, 2H), 1.46 (s, 9H); <sup>13</sup>C NMR (CDCl<sub>3</sub>)  $\delta$  155.2, 141.0, 138.0, 131.6 (q,  $J$  = 32.8 Hz), 128.3, 127.2, 127.0, 123.2 (q,  $J$  = 271 Hz), 121.4 (m), 80.1, 78.7, 69.1, 55.5, 39.2, 28.4, 25.8, 24.1. ESI-MS *m/z* 526.1 (M + Na<sup>+</sup>); HR-ESI-MS *m/z* Calcd for C<sub>25</sub>H<sub>28</sub>F<sub>6</sub>NO<sub>3</sub> (M + H<sup>+</sup>) 504.1973, Found 504.1949.

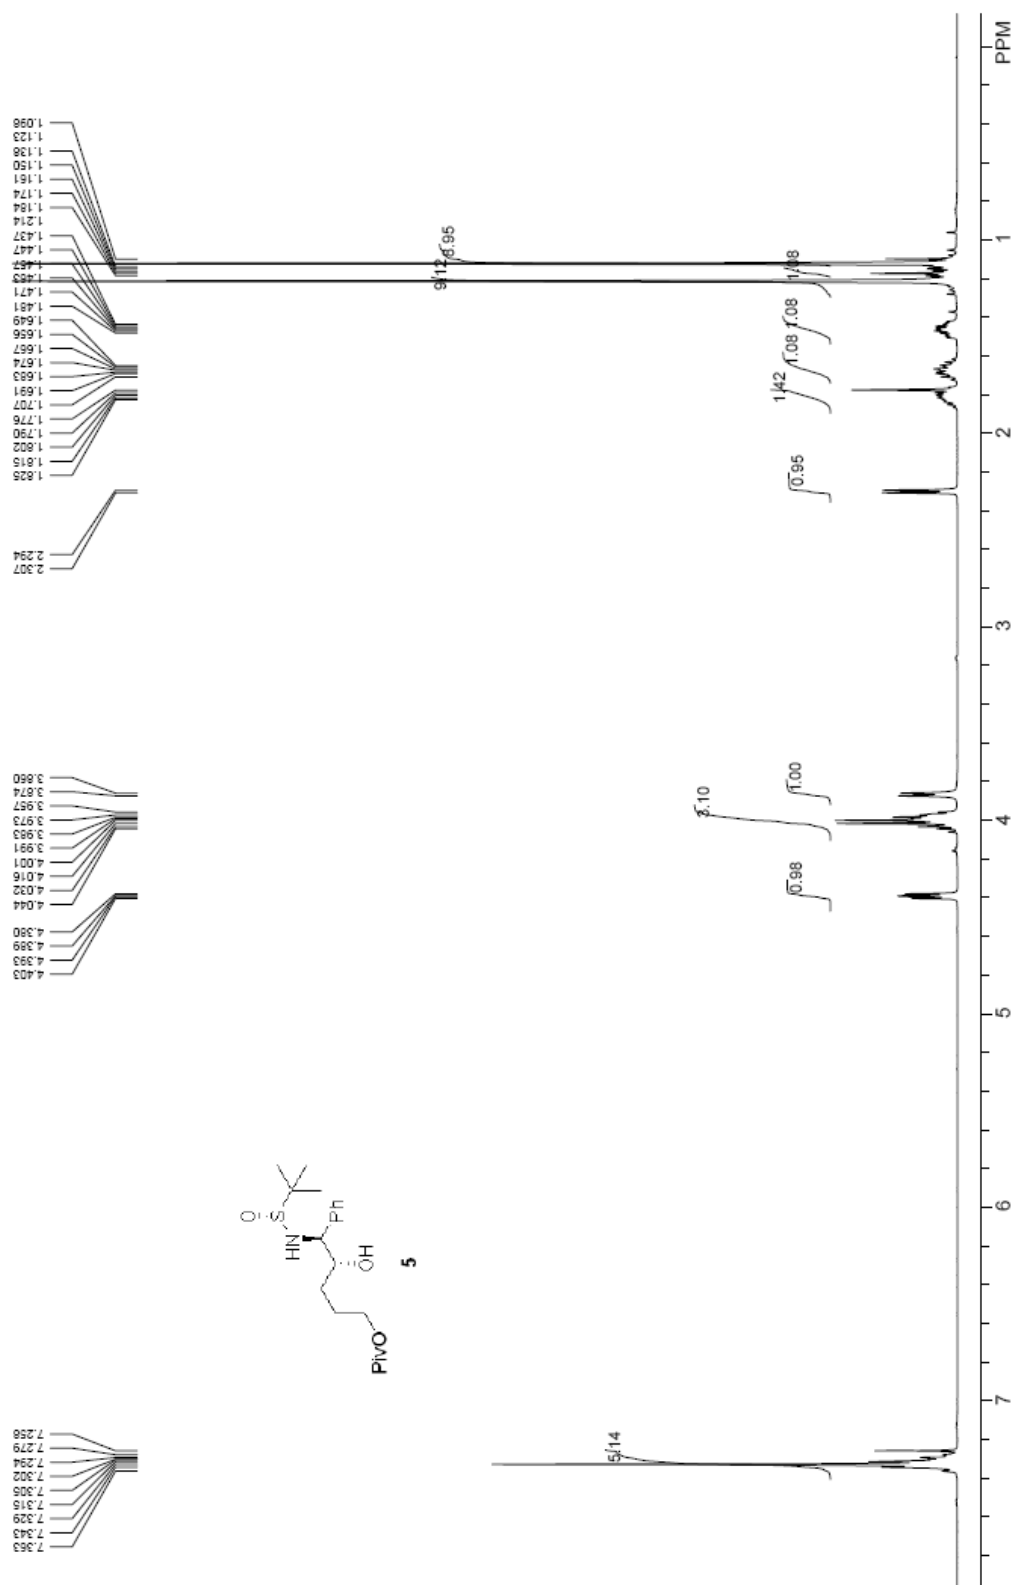

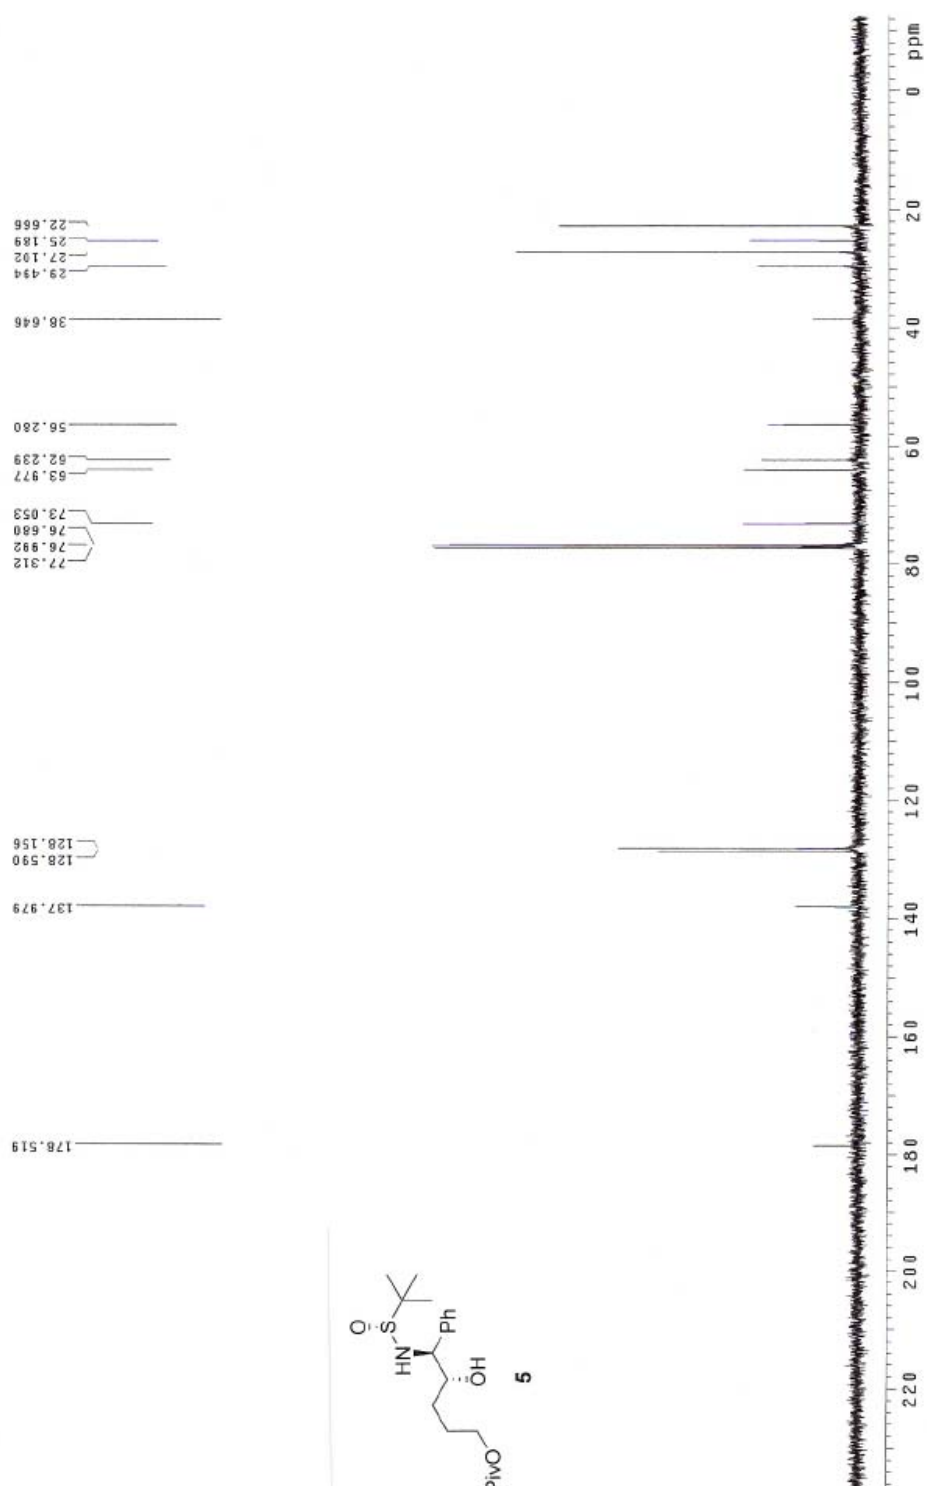

LRH-3-67-2 C13-CDCl3 071225

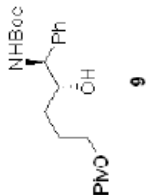

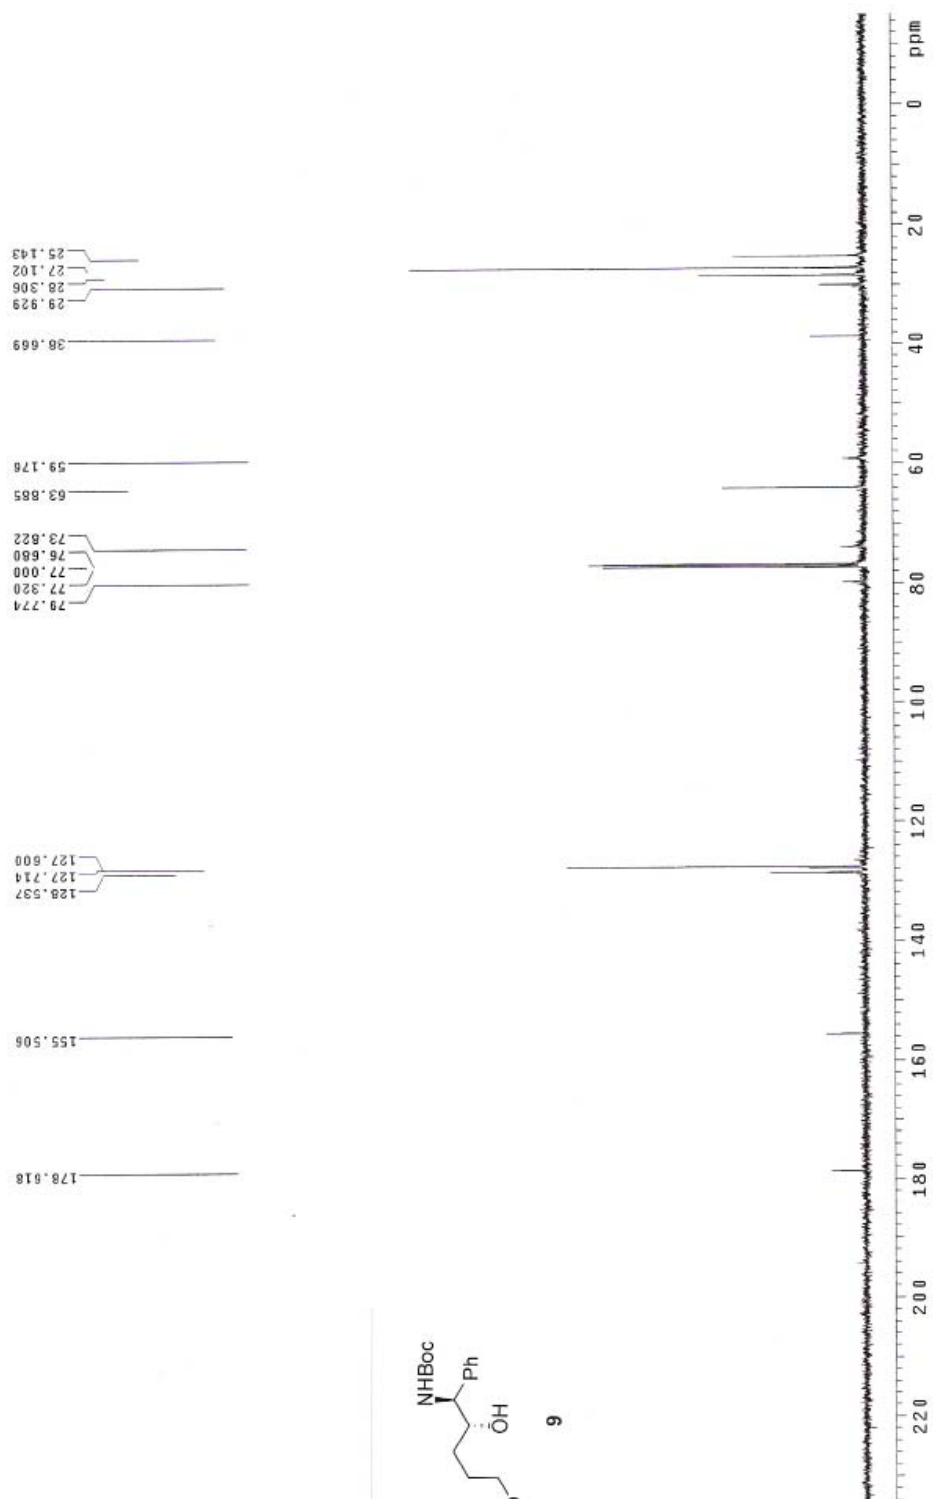



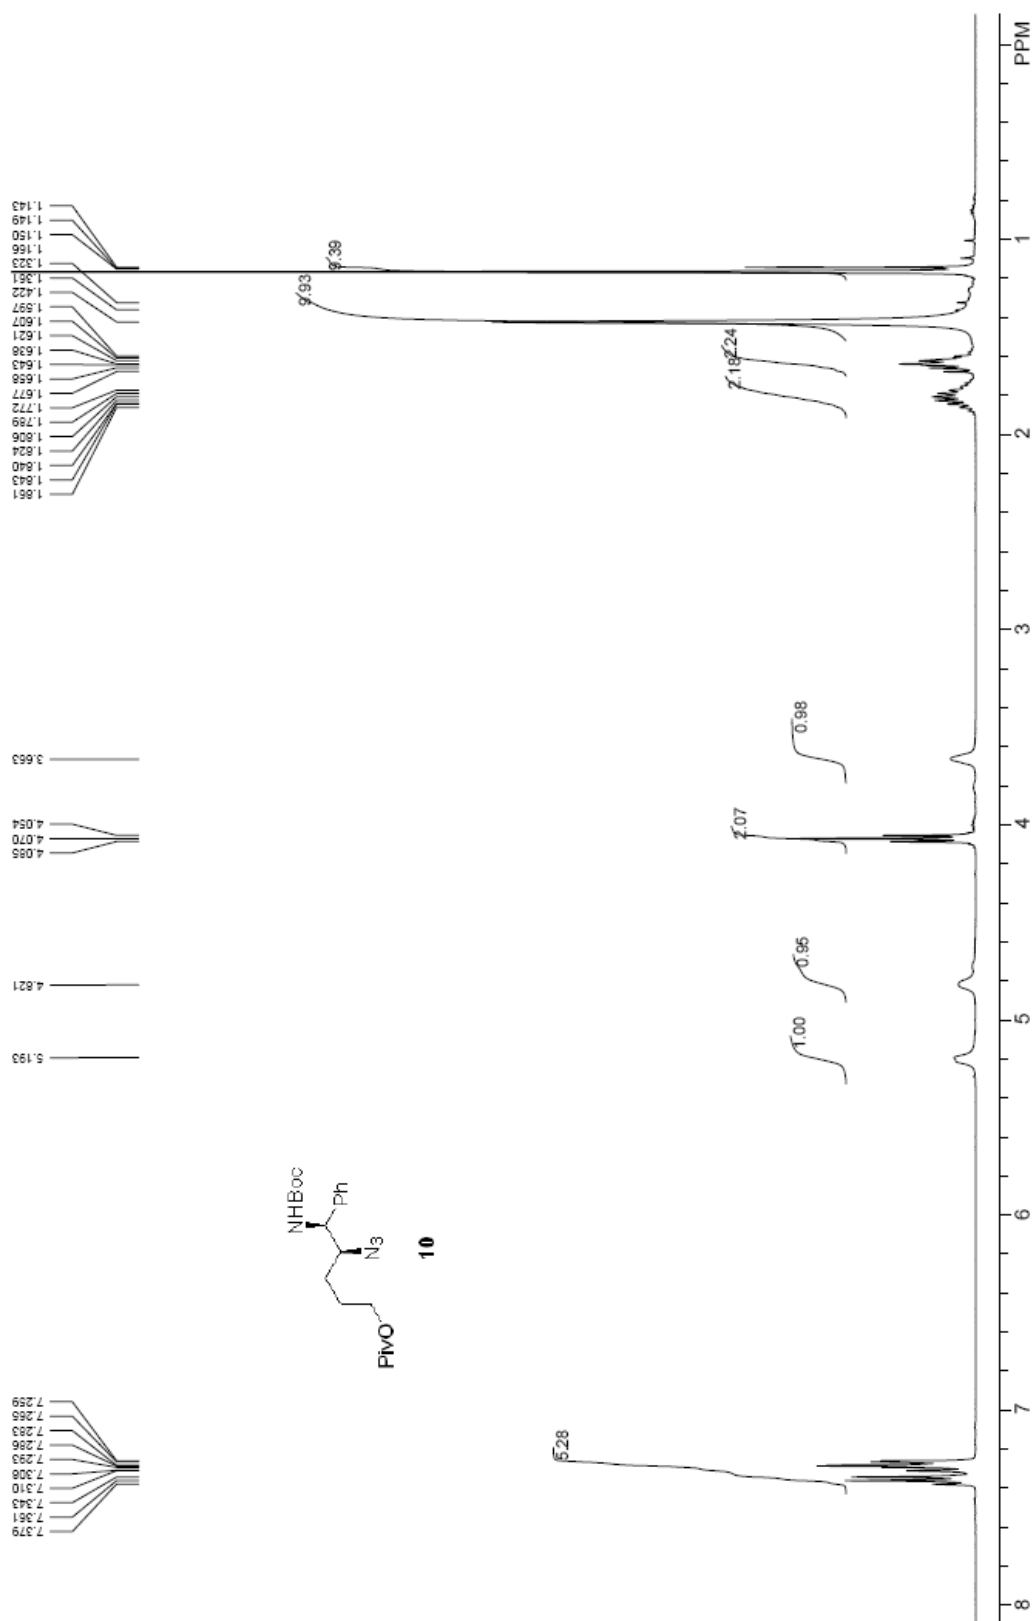

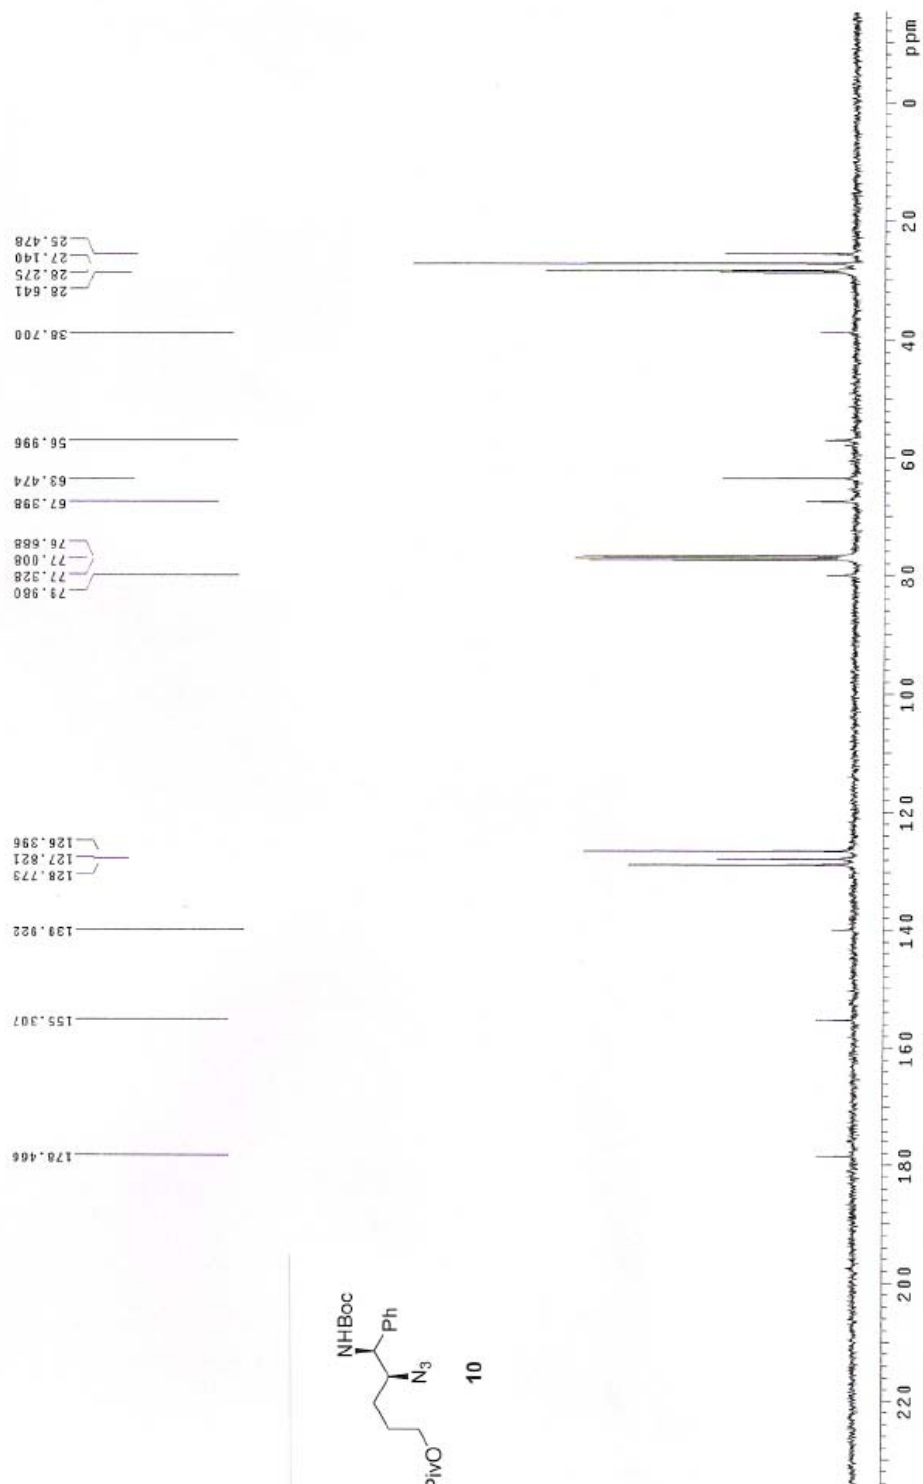

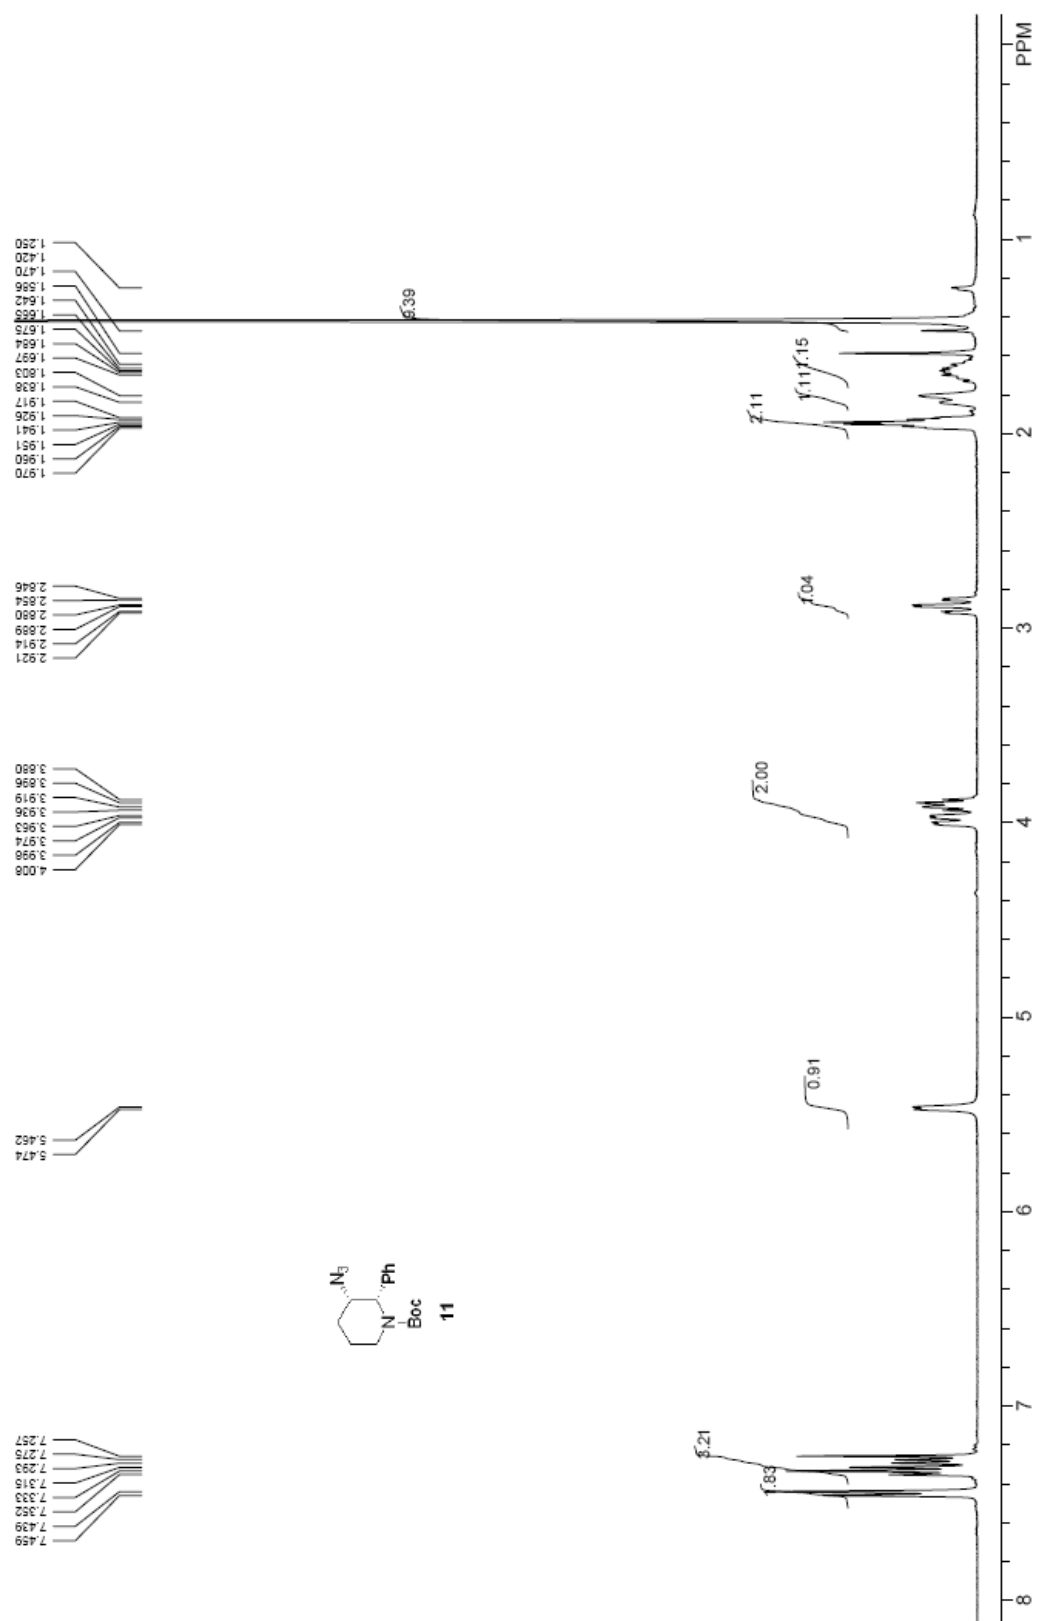

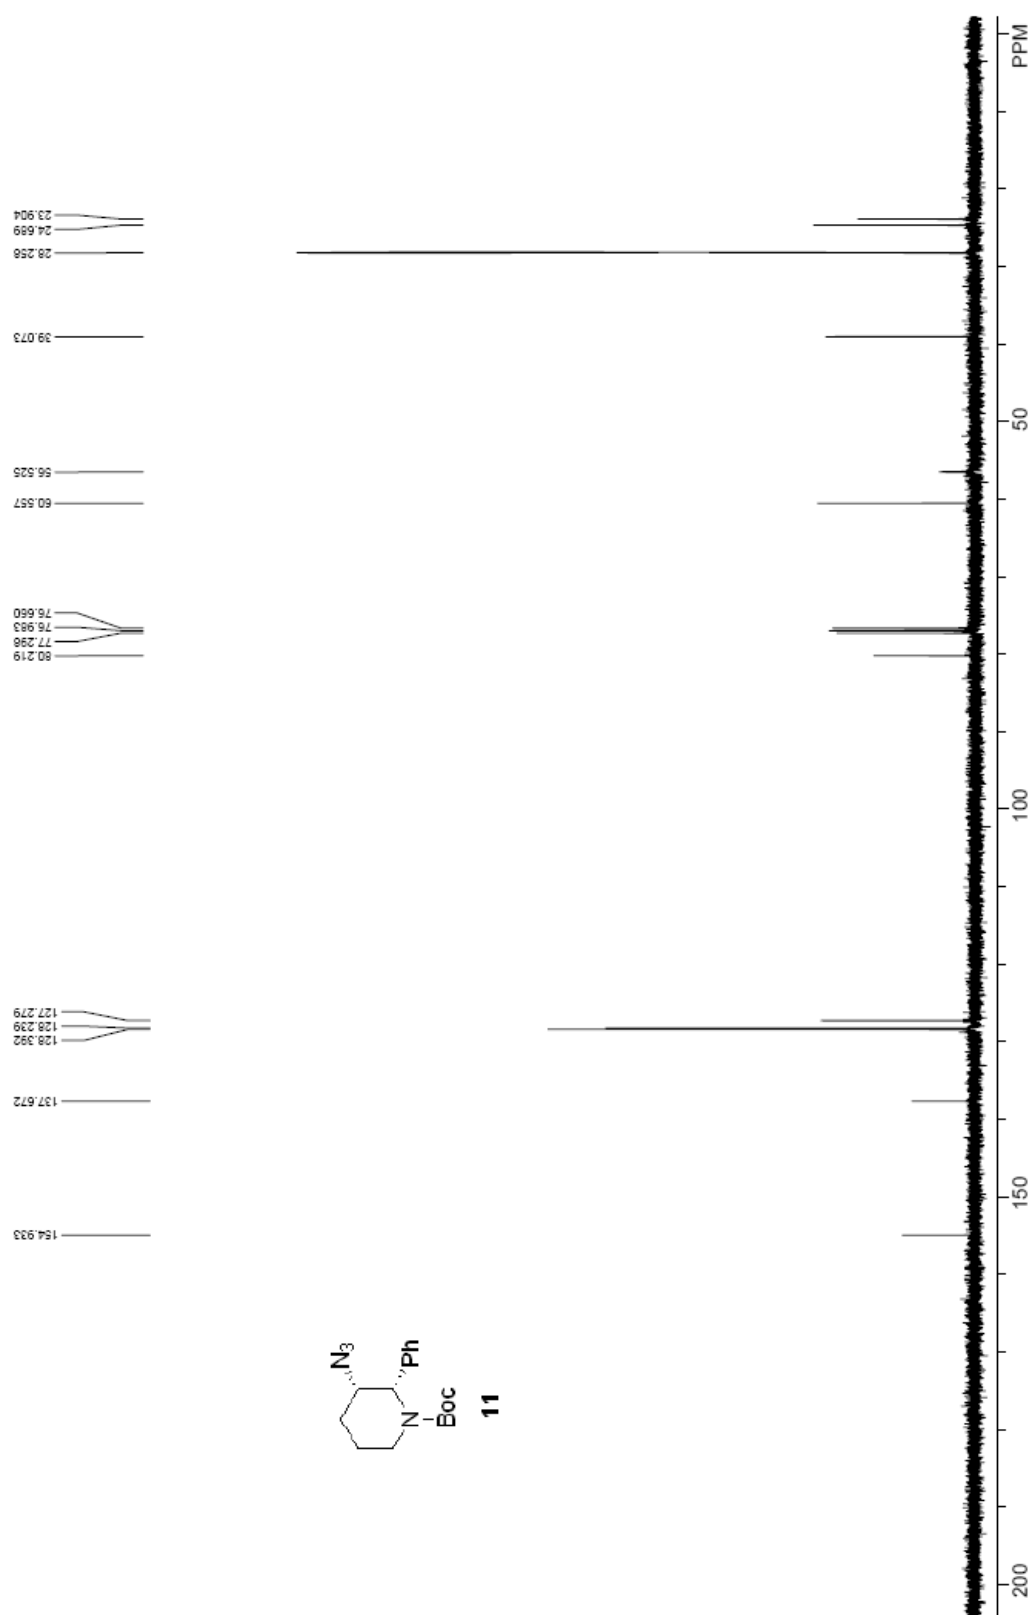

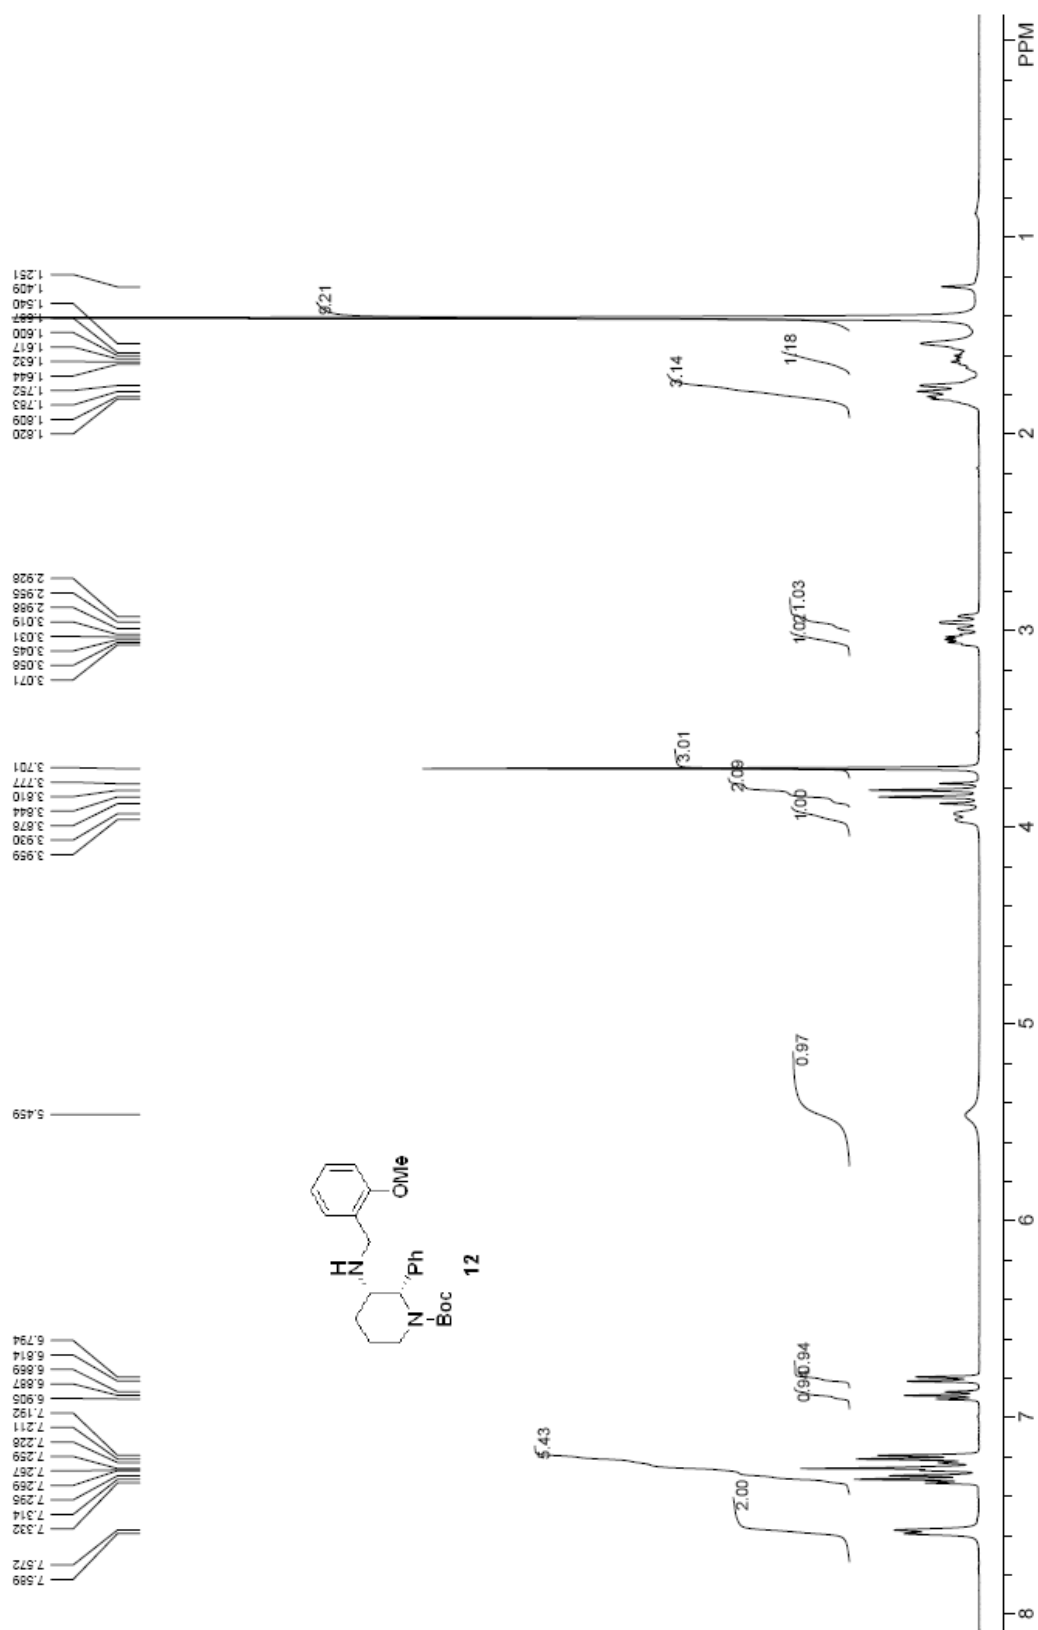

LRH-3-06-1 C13-CDC13 071225

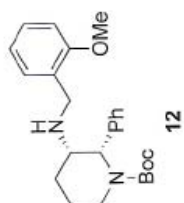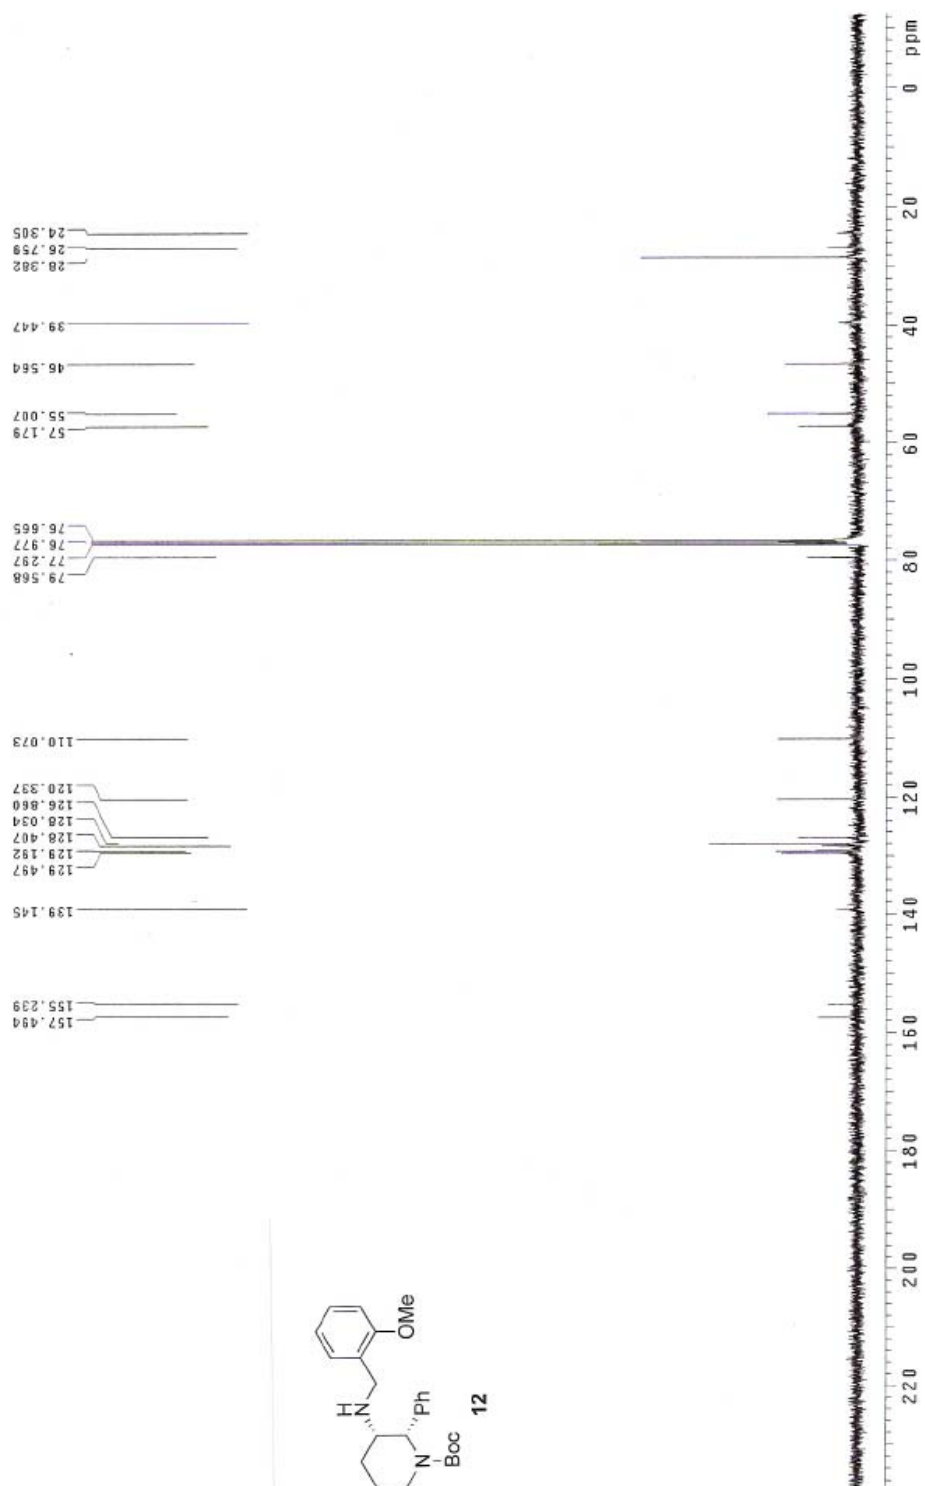

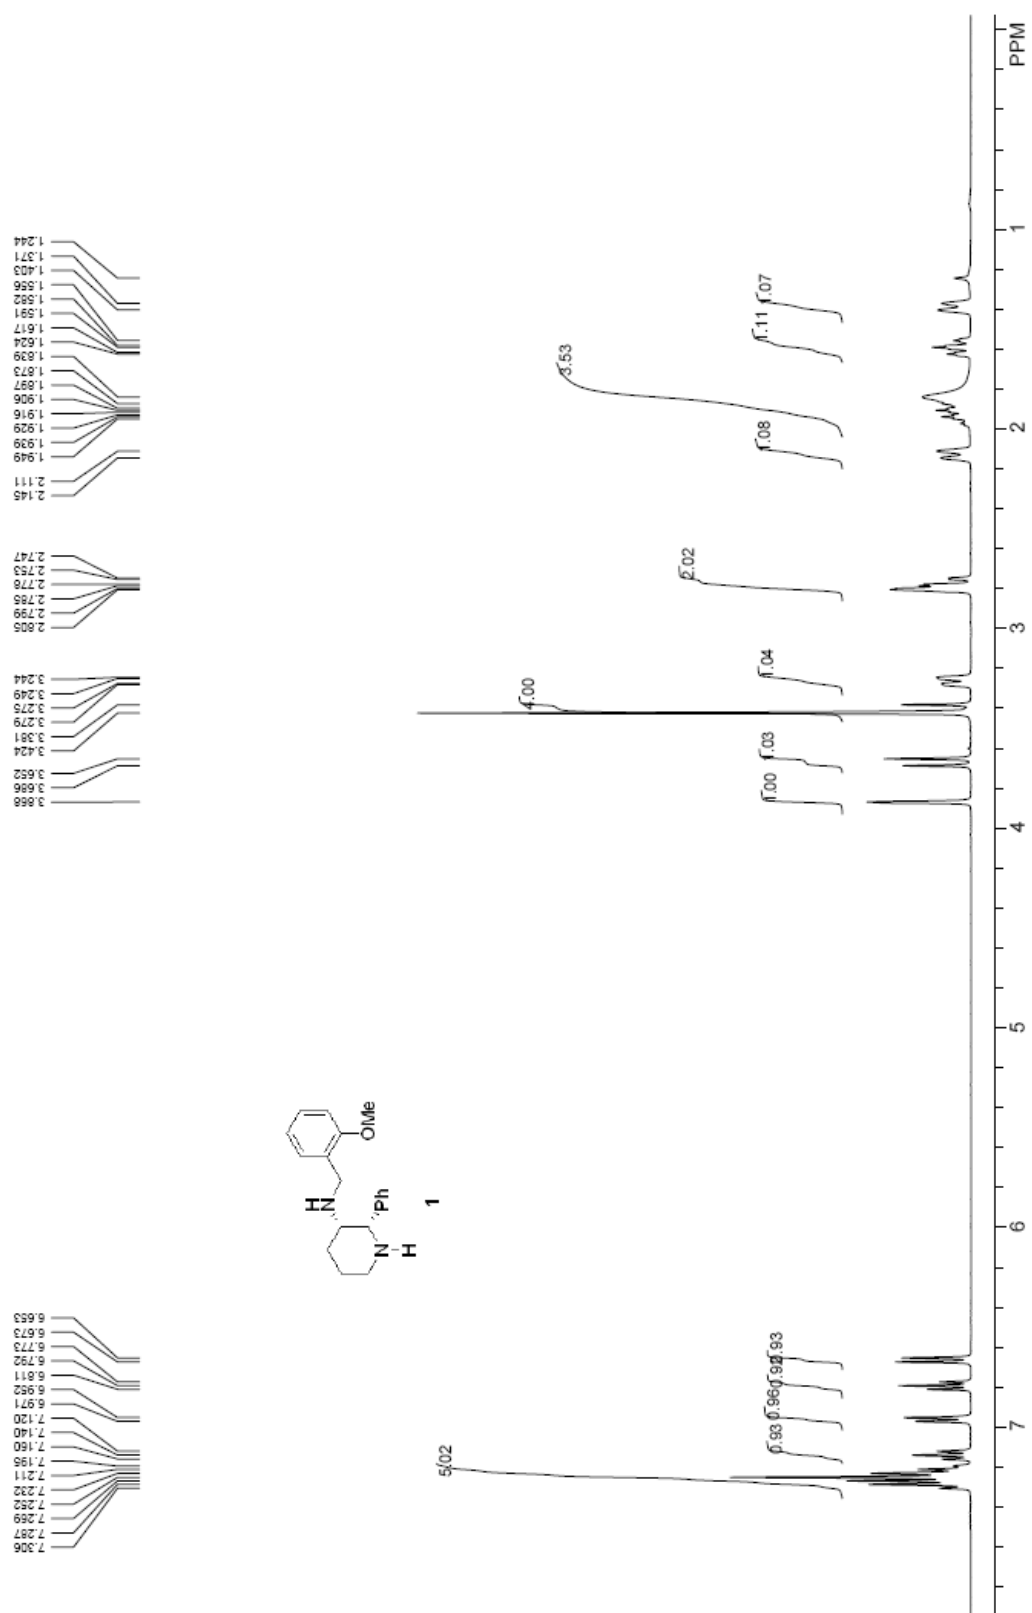

LRH-S-59-1 C13-COC13 071203

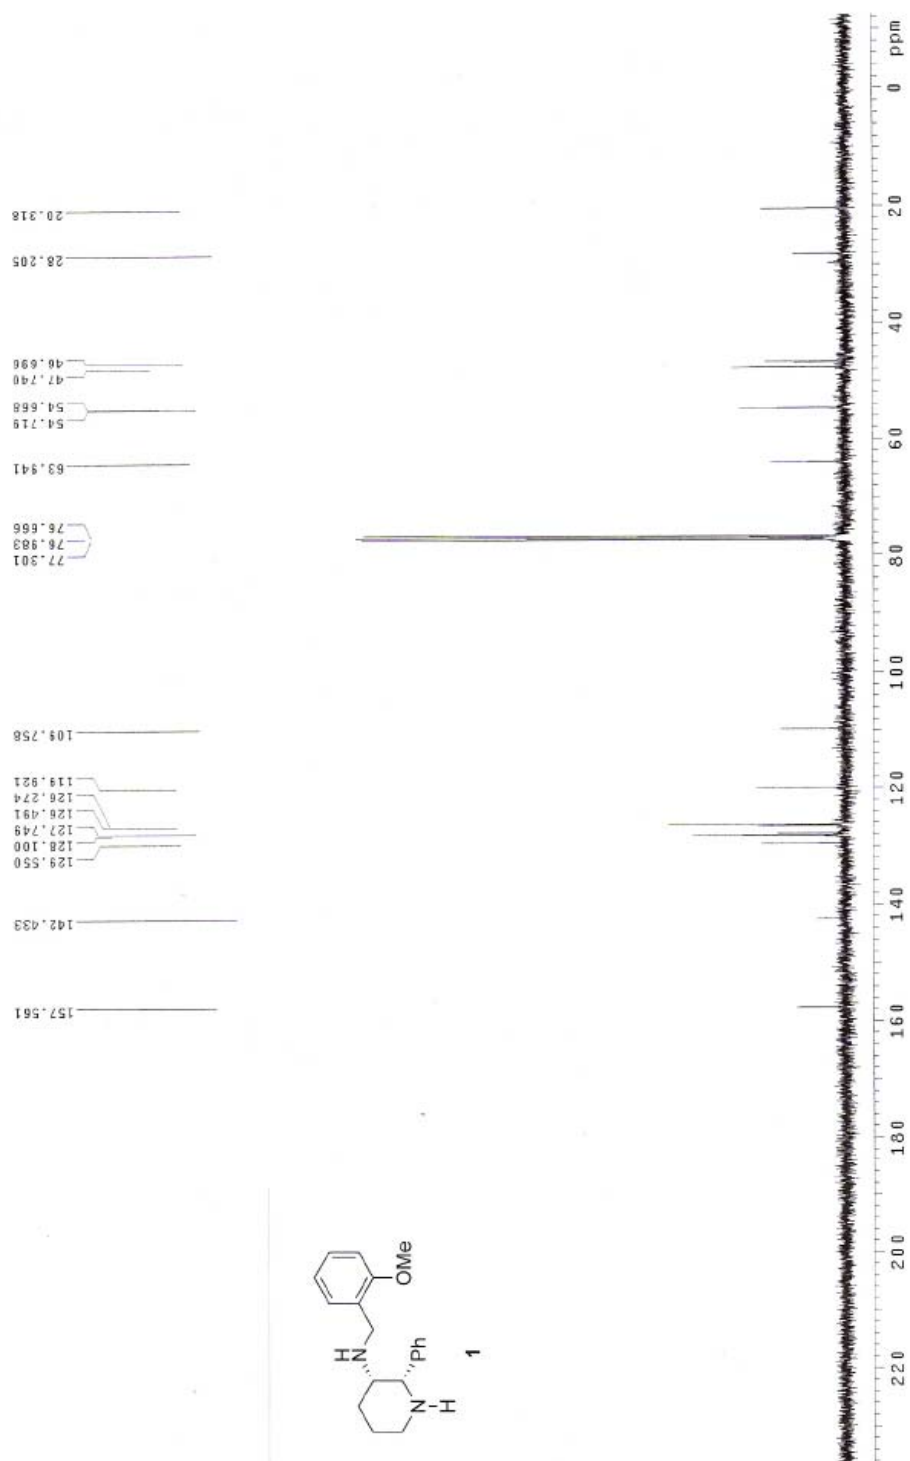



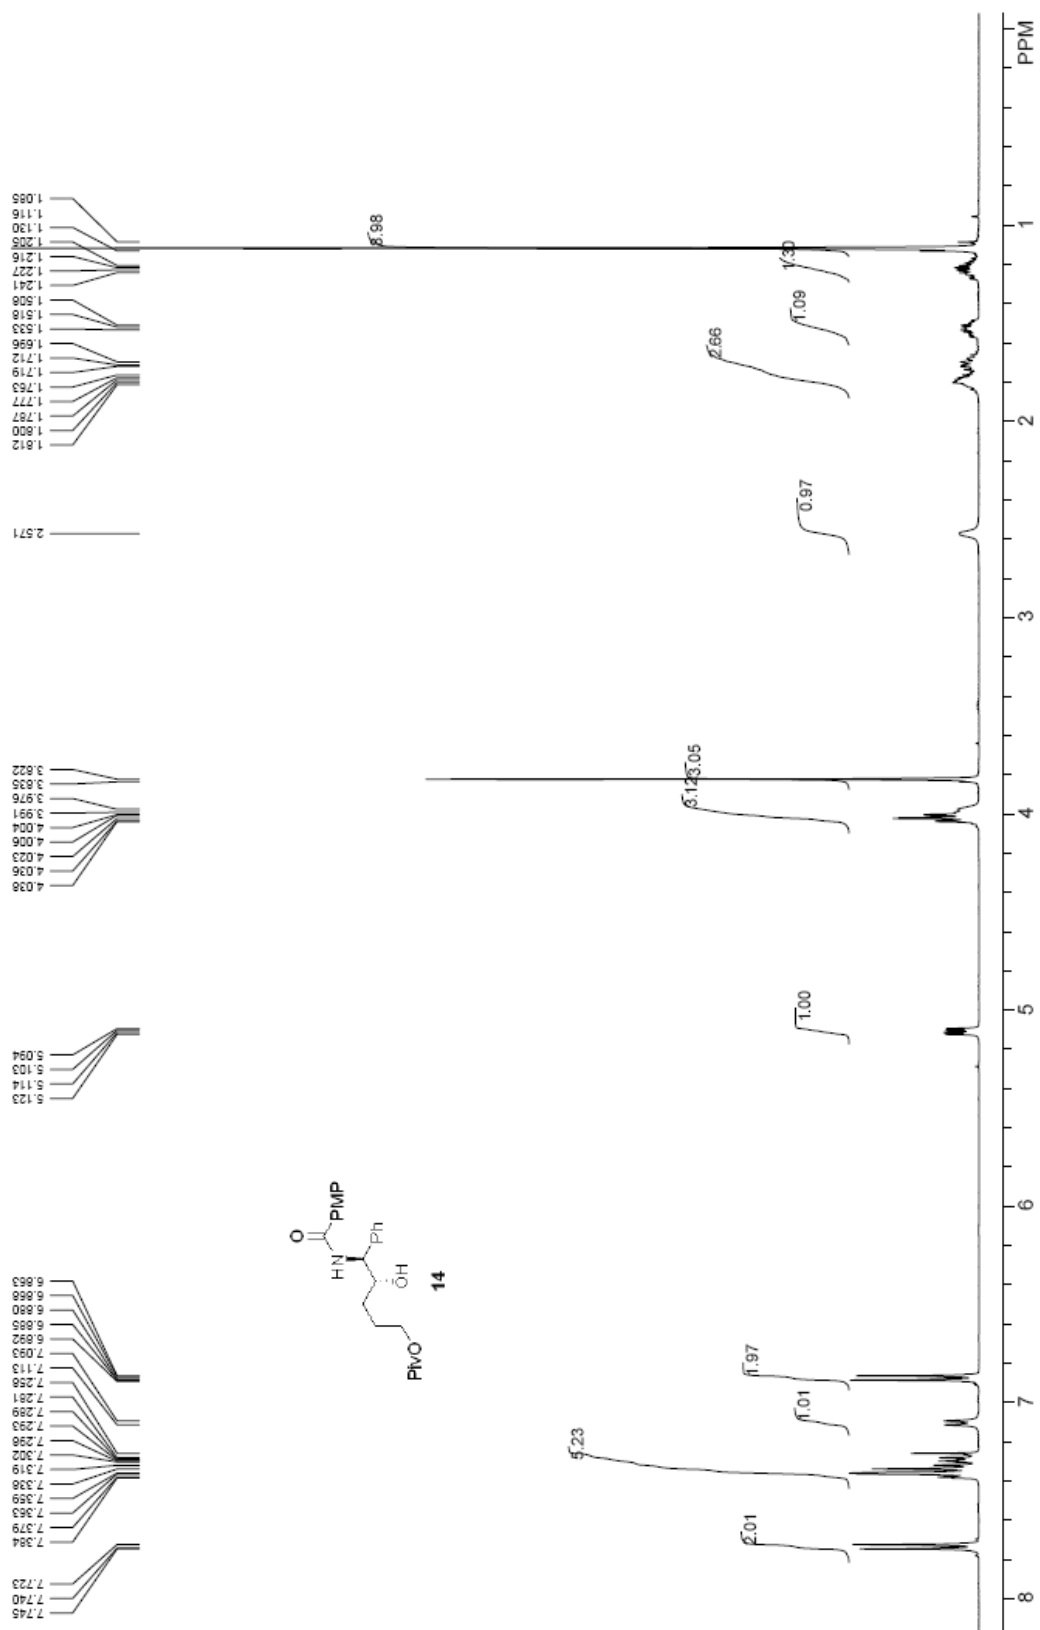

LRH-3-68-1 C13-CDC13 071227

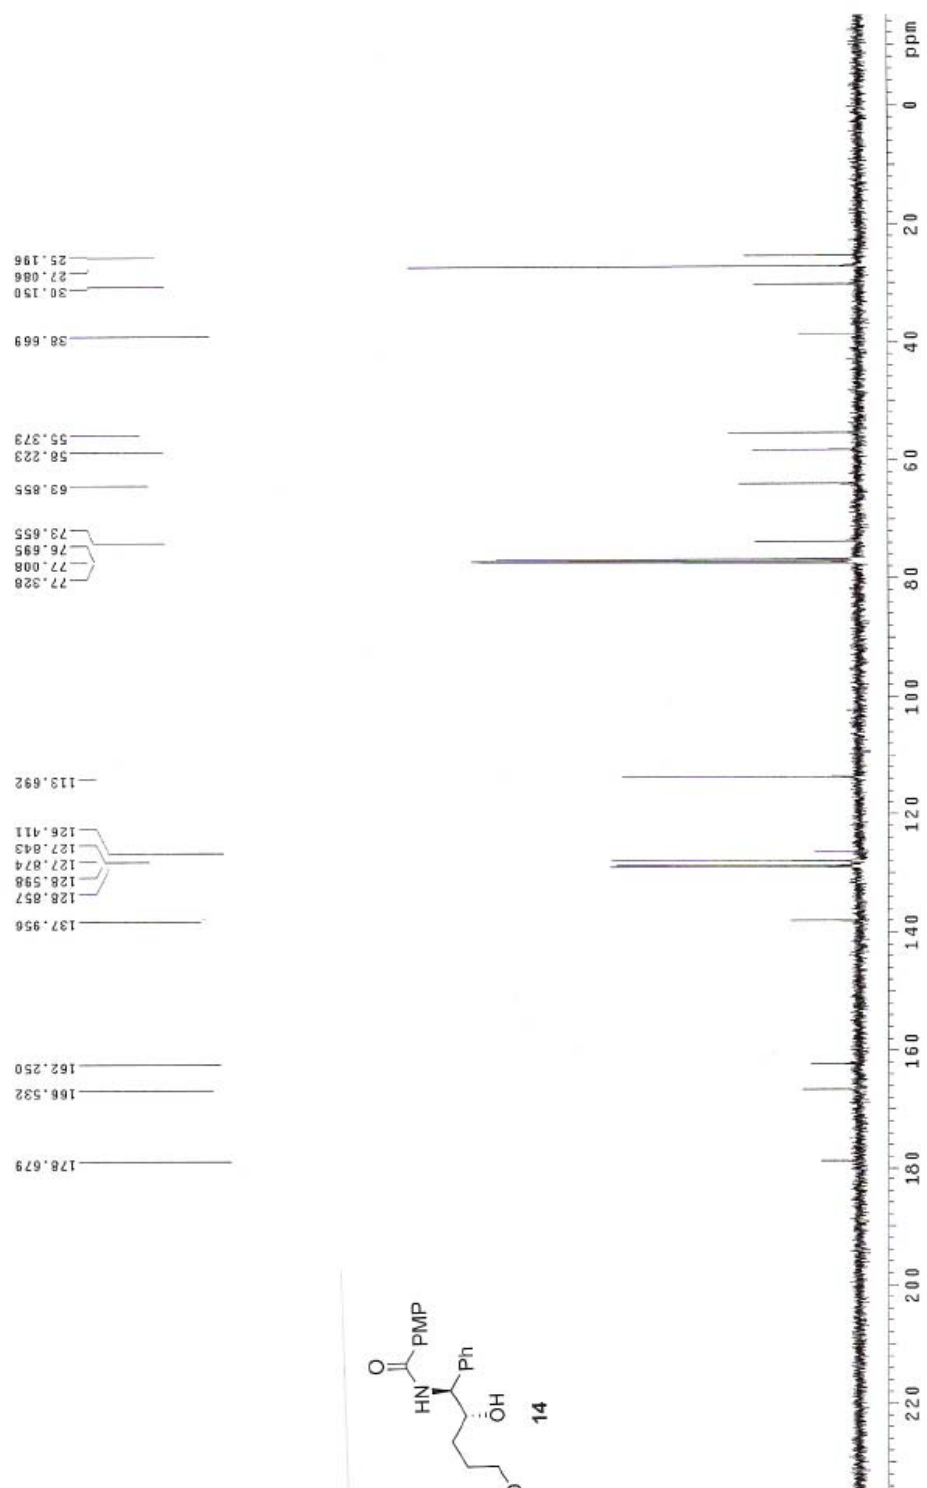

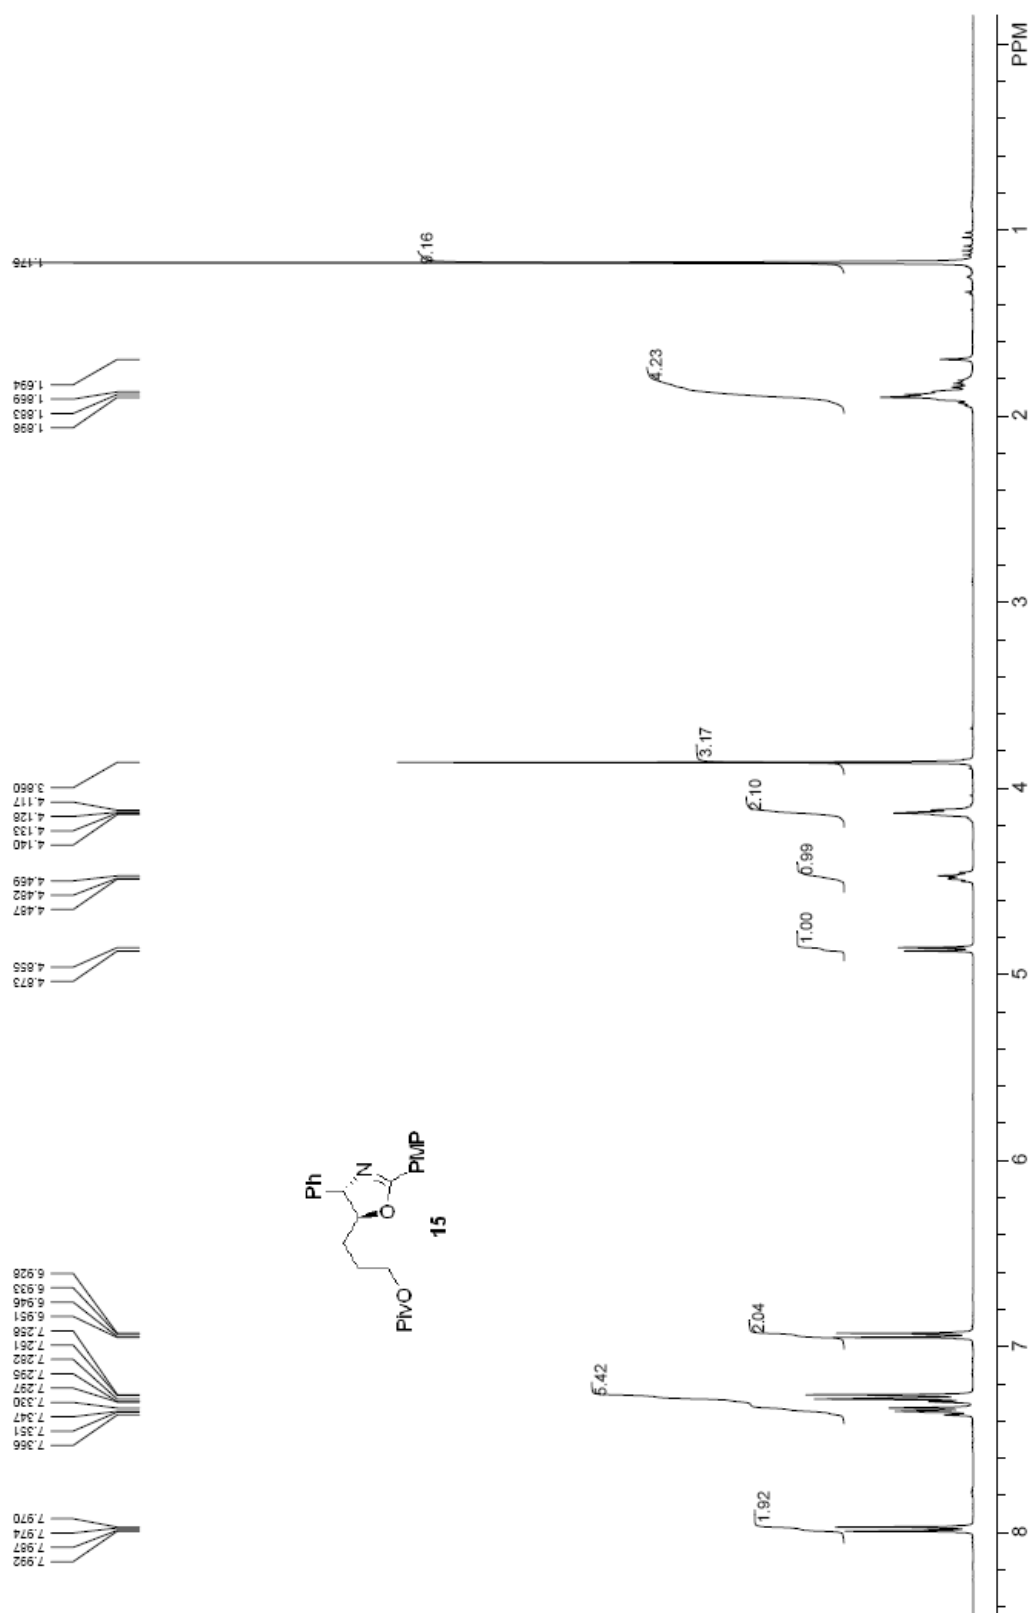

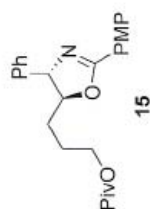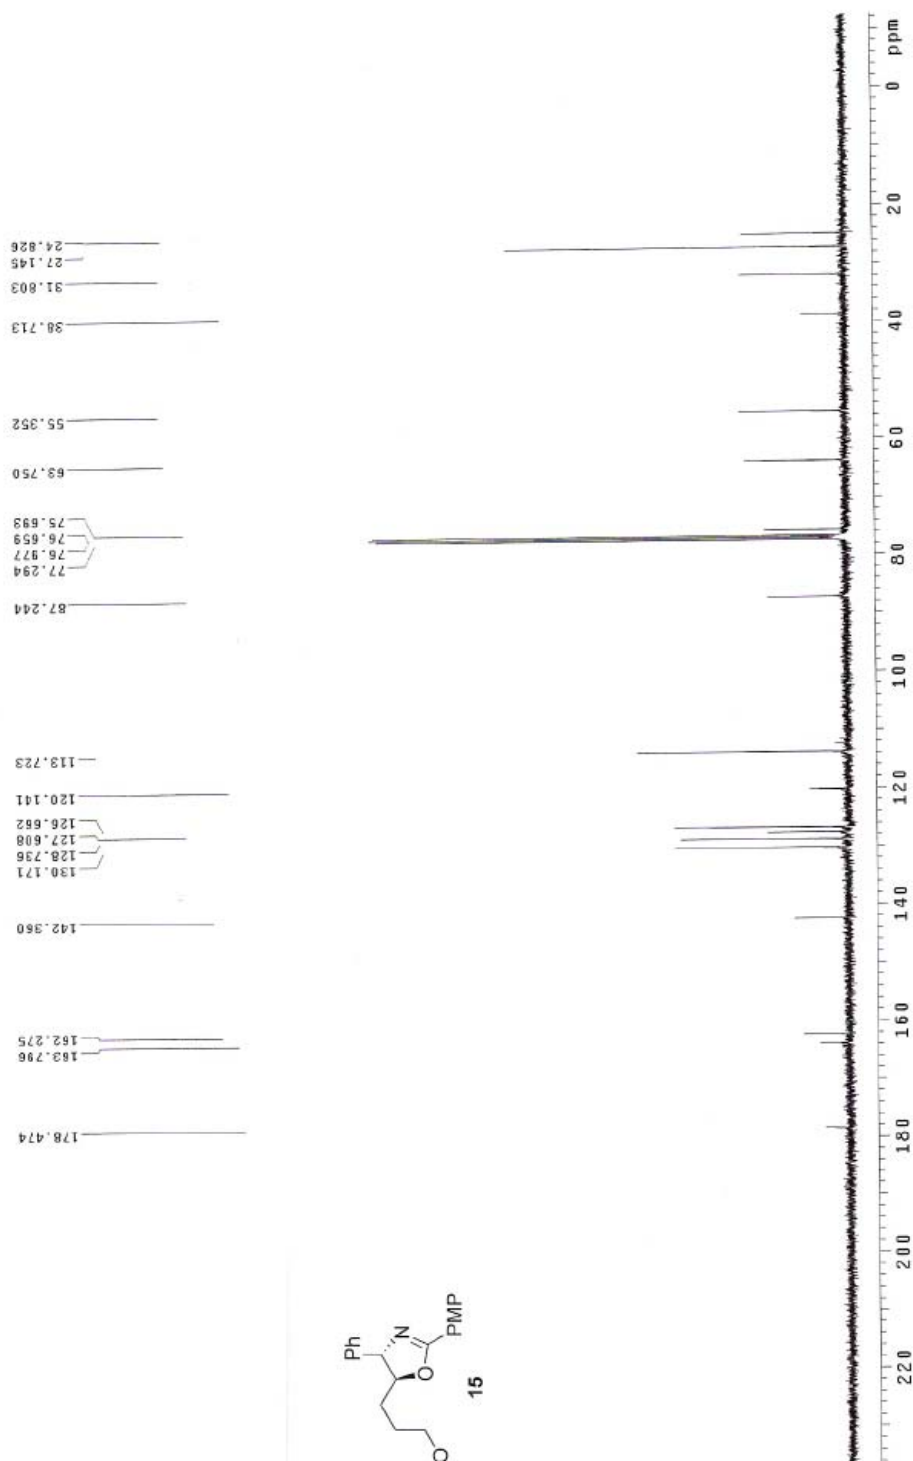

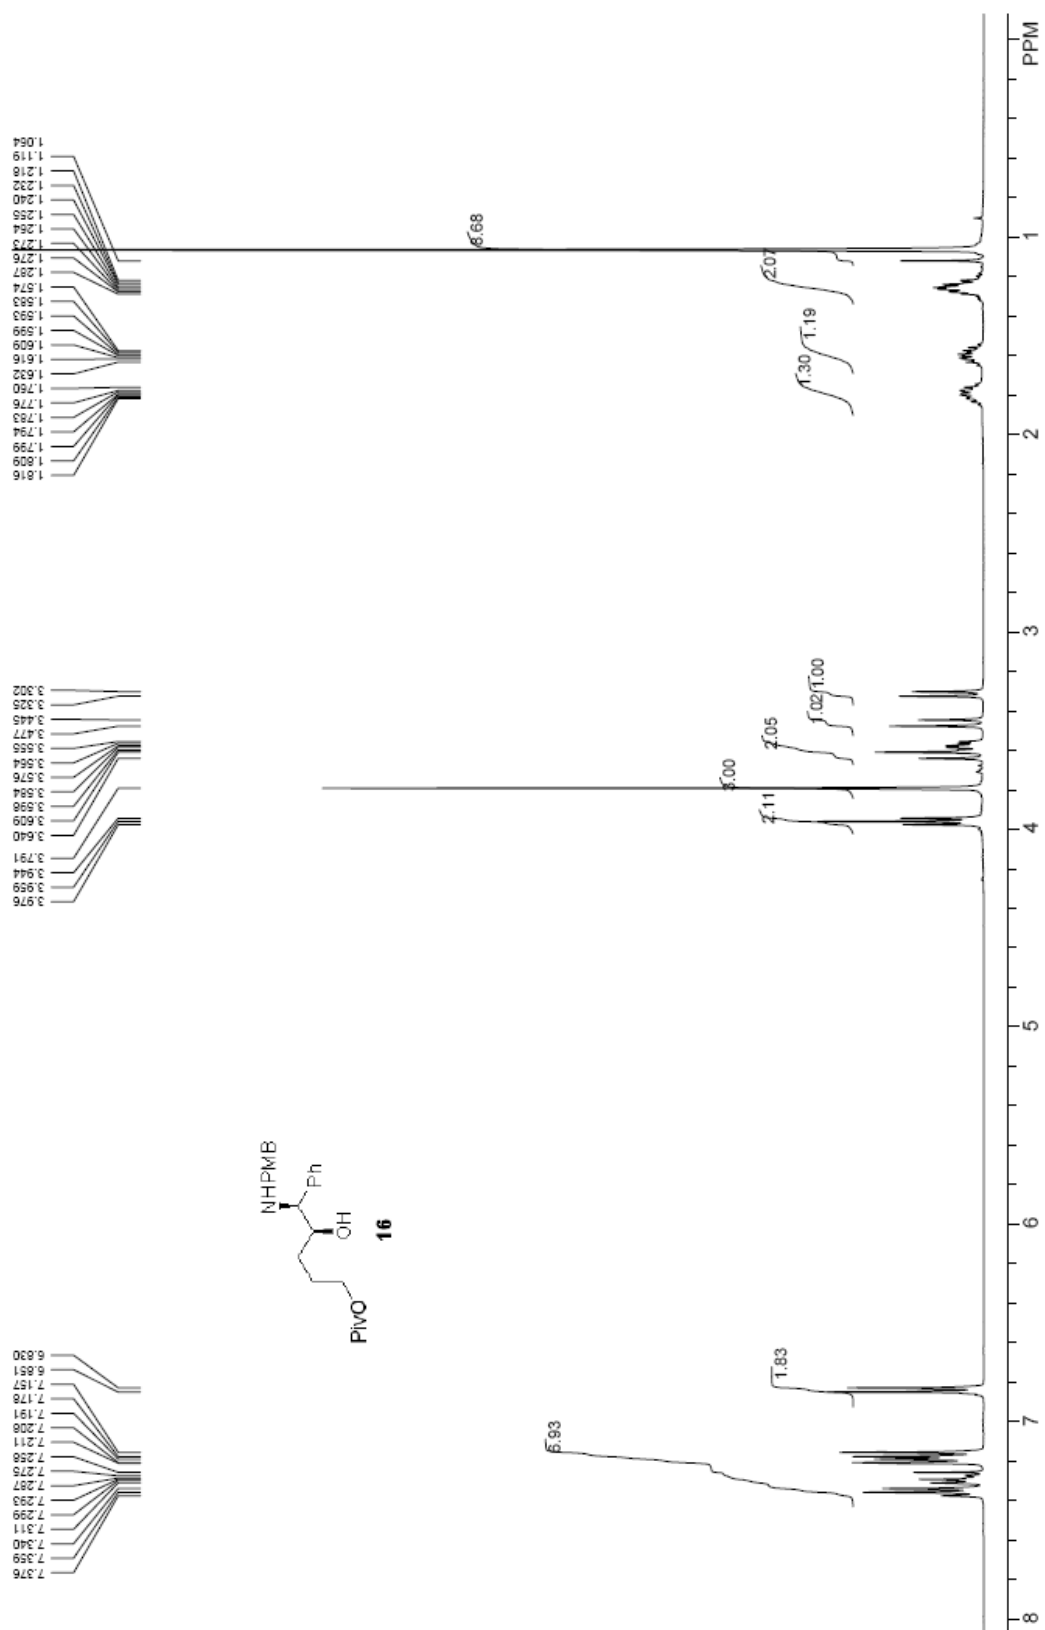

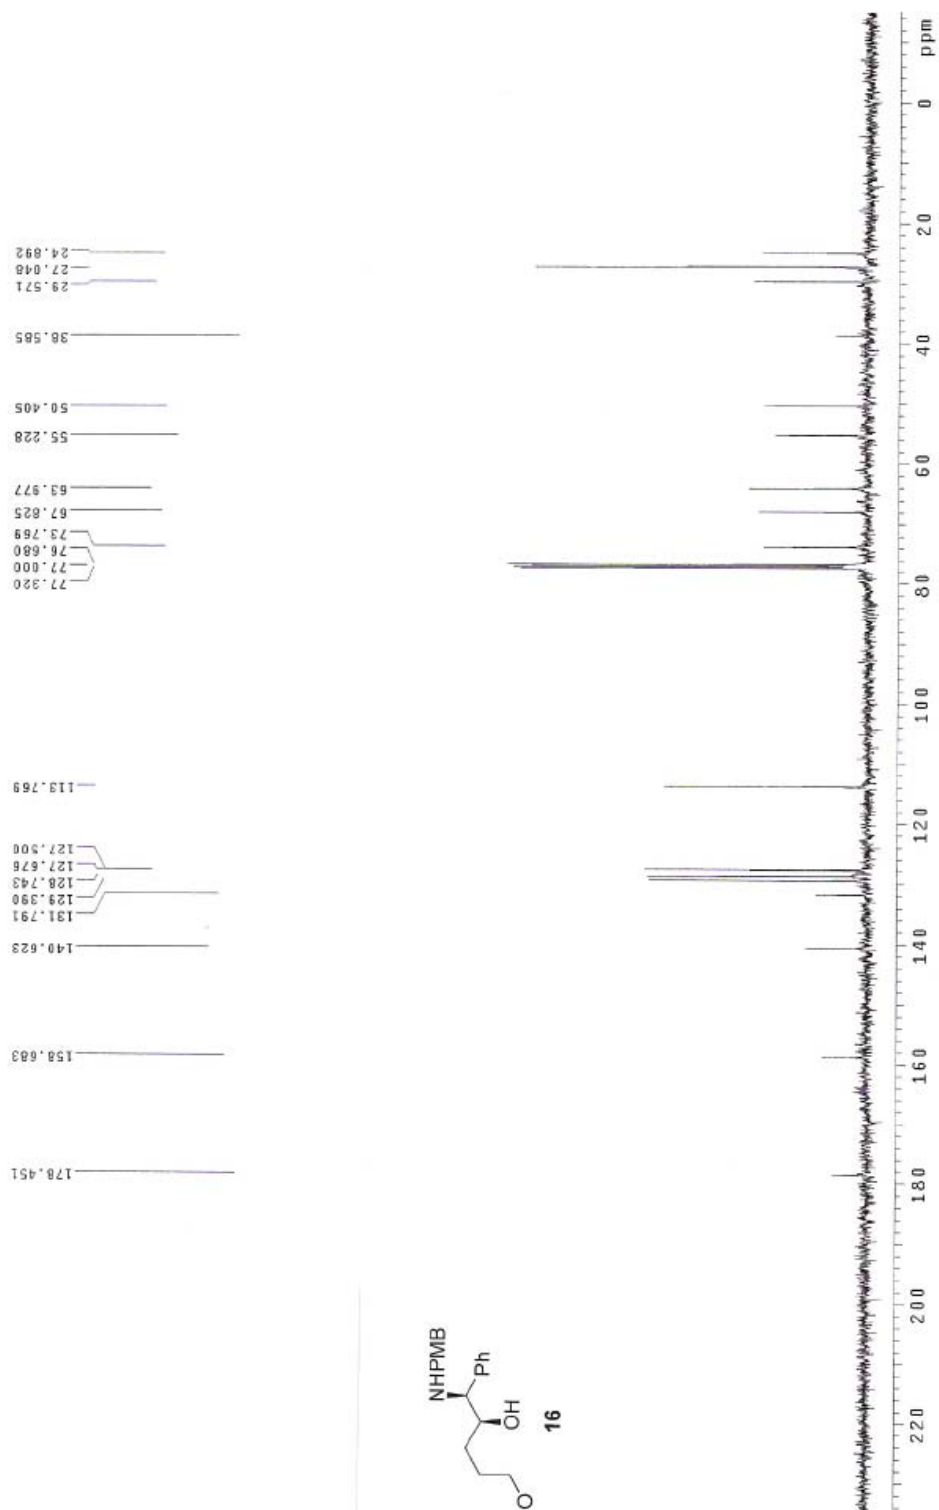

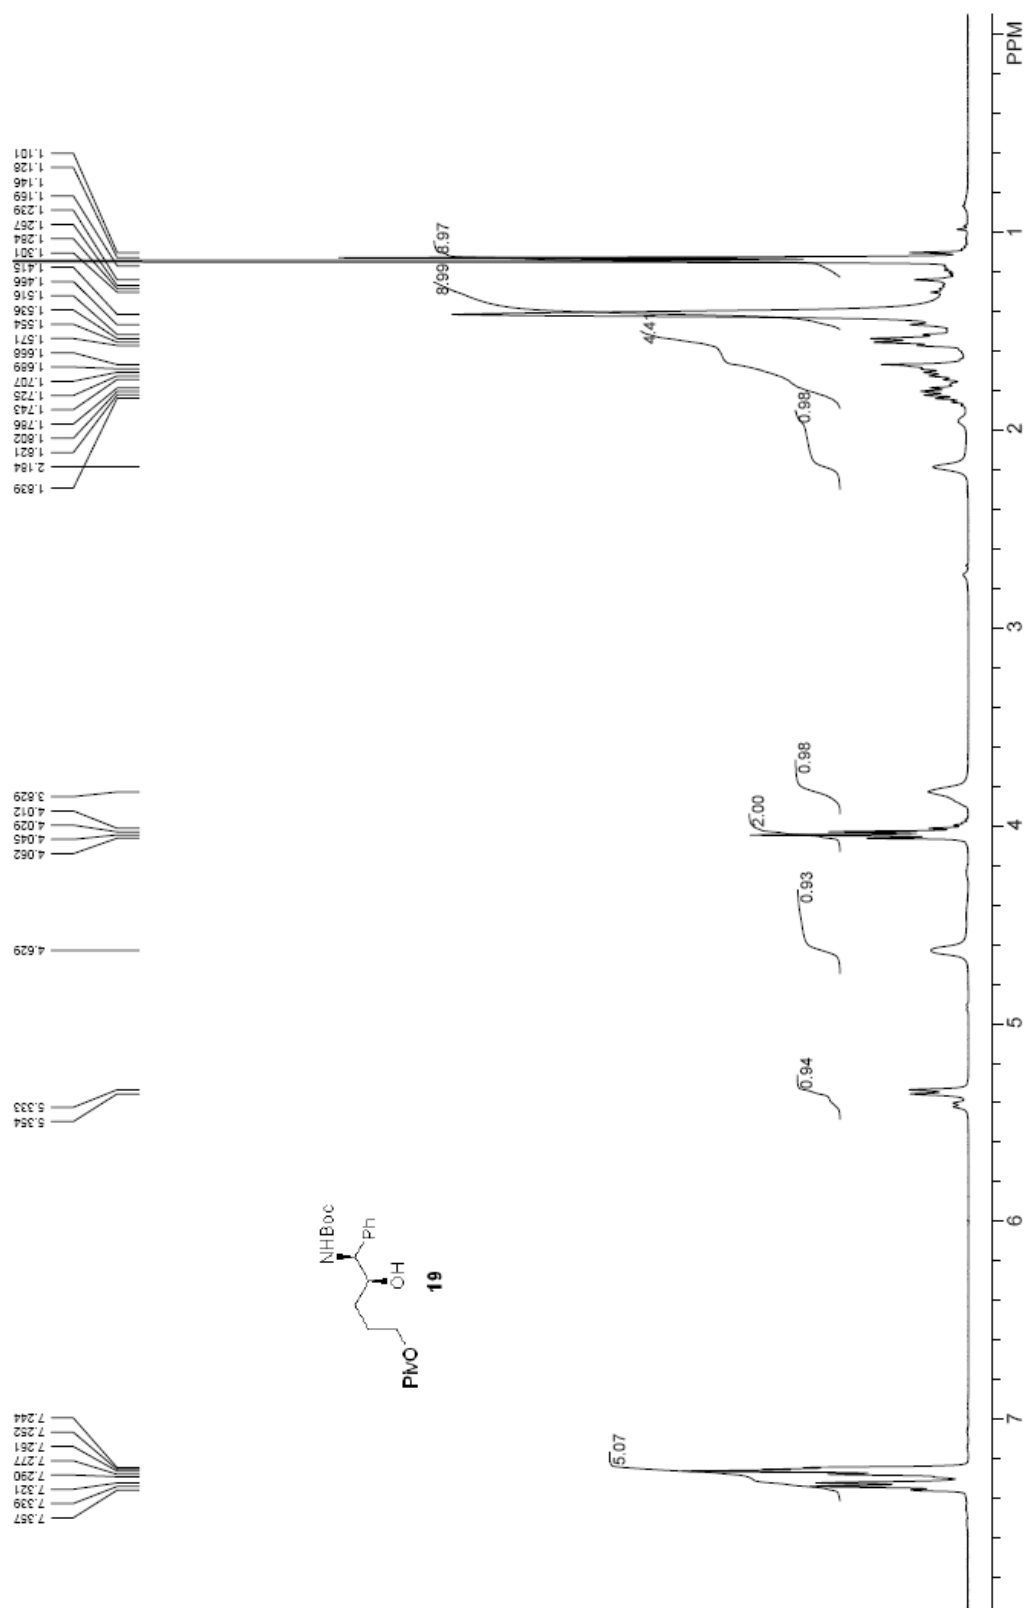

LRH-3-42-2a C13-CDC13 080107

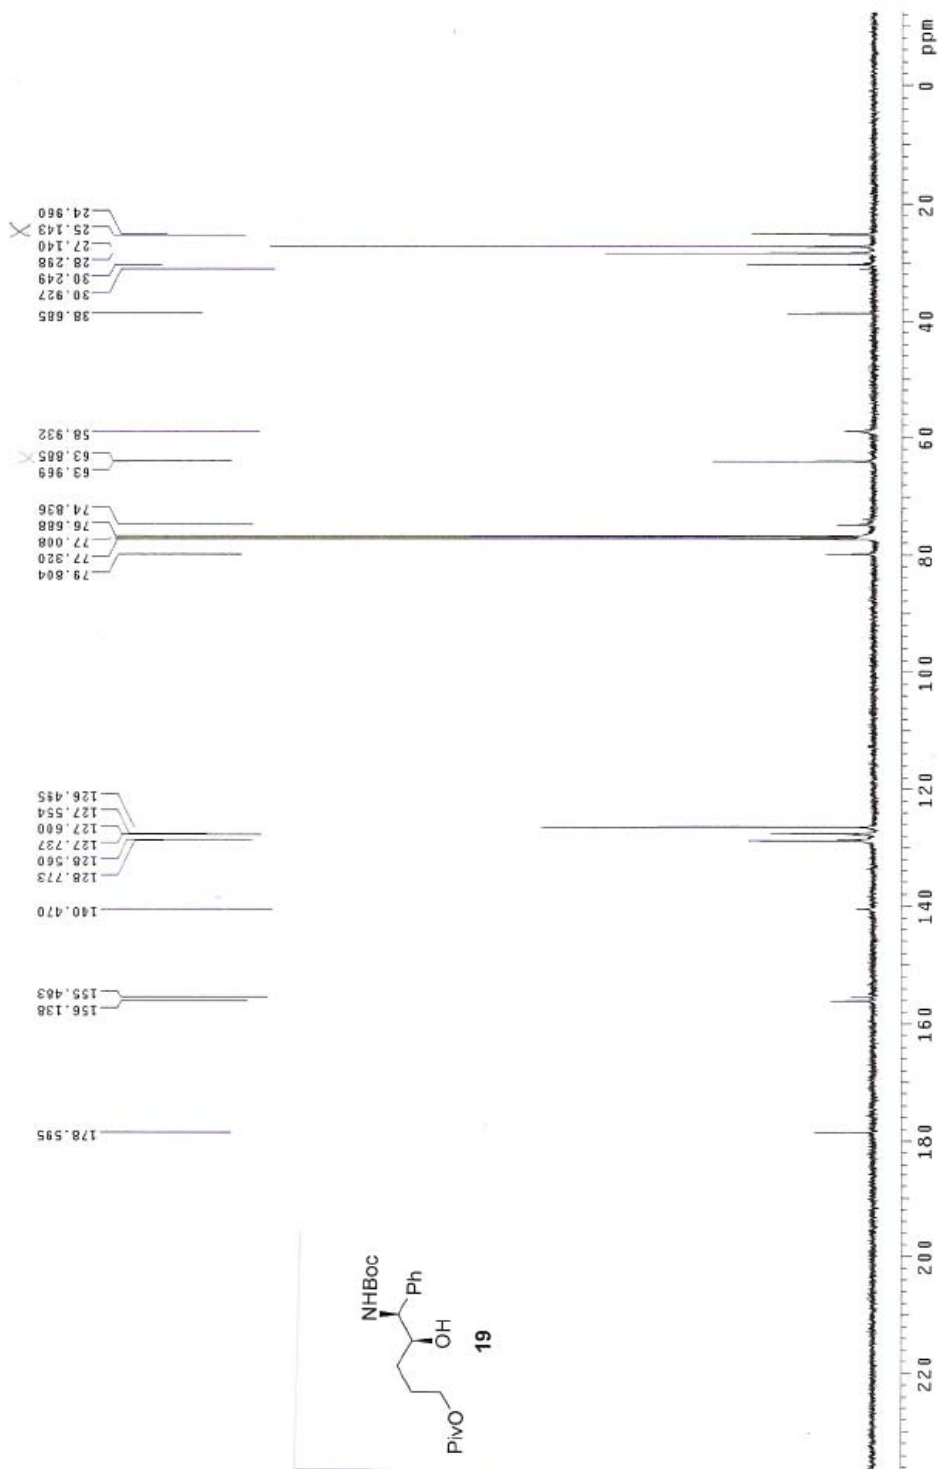



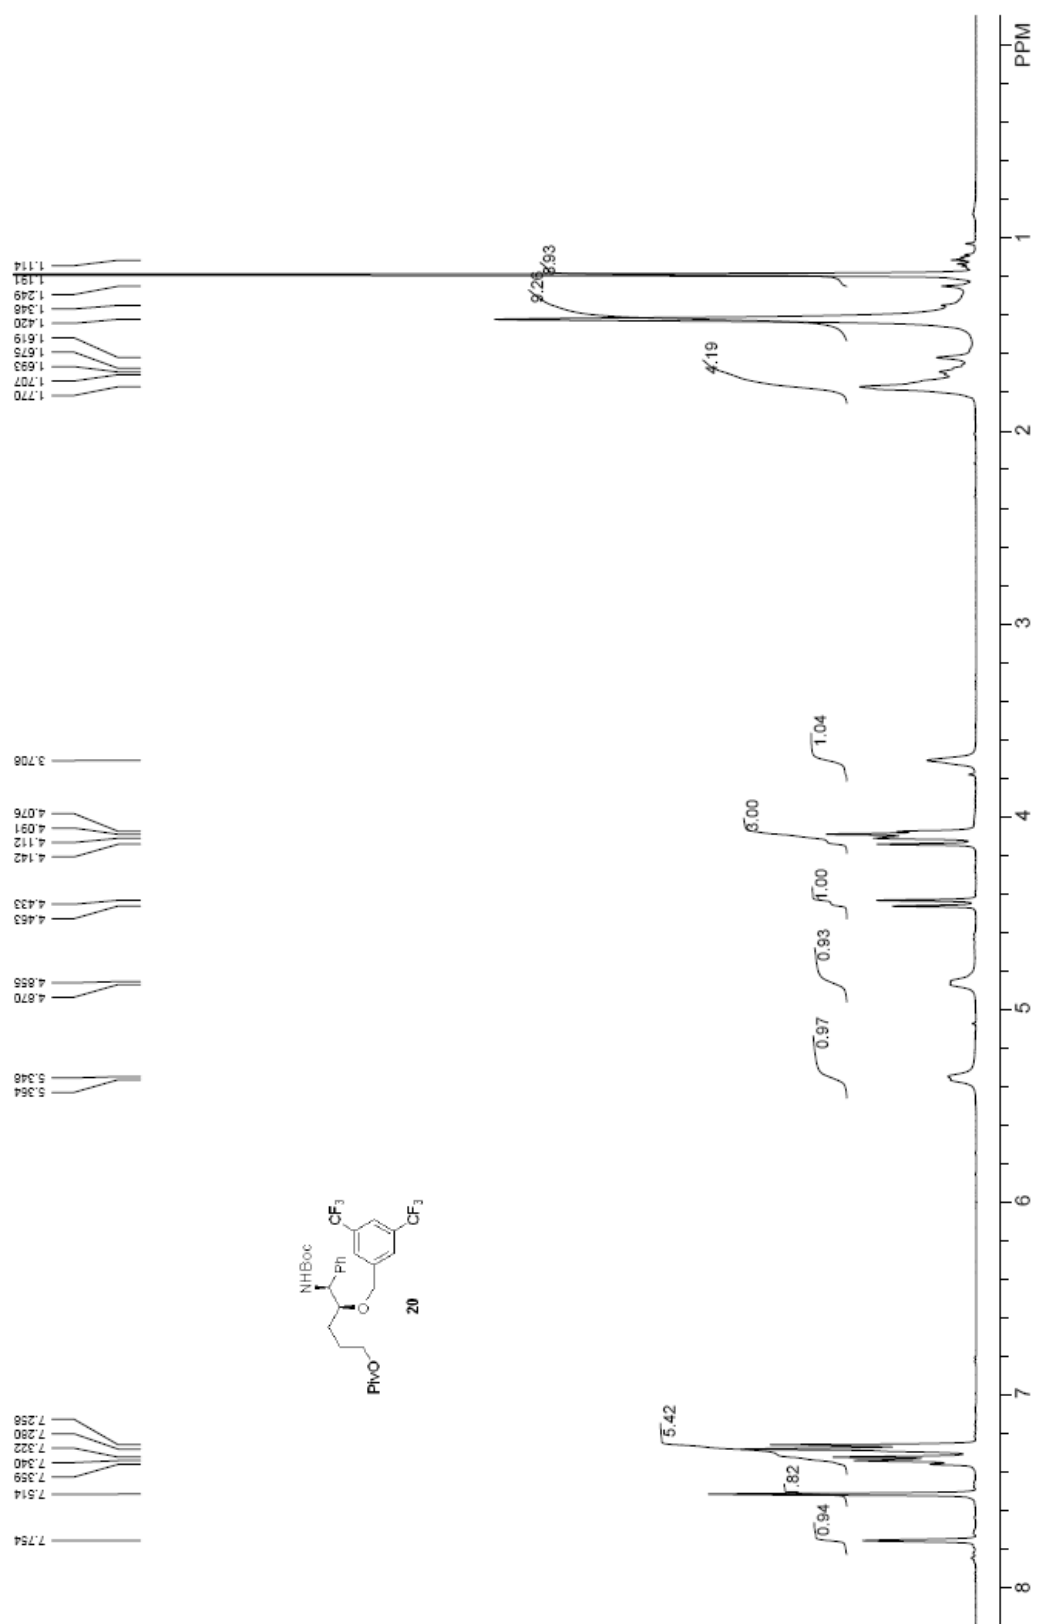

LRH-3-86-1 C13-CDC13 060108

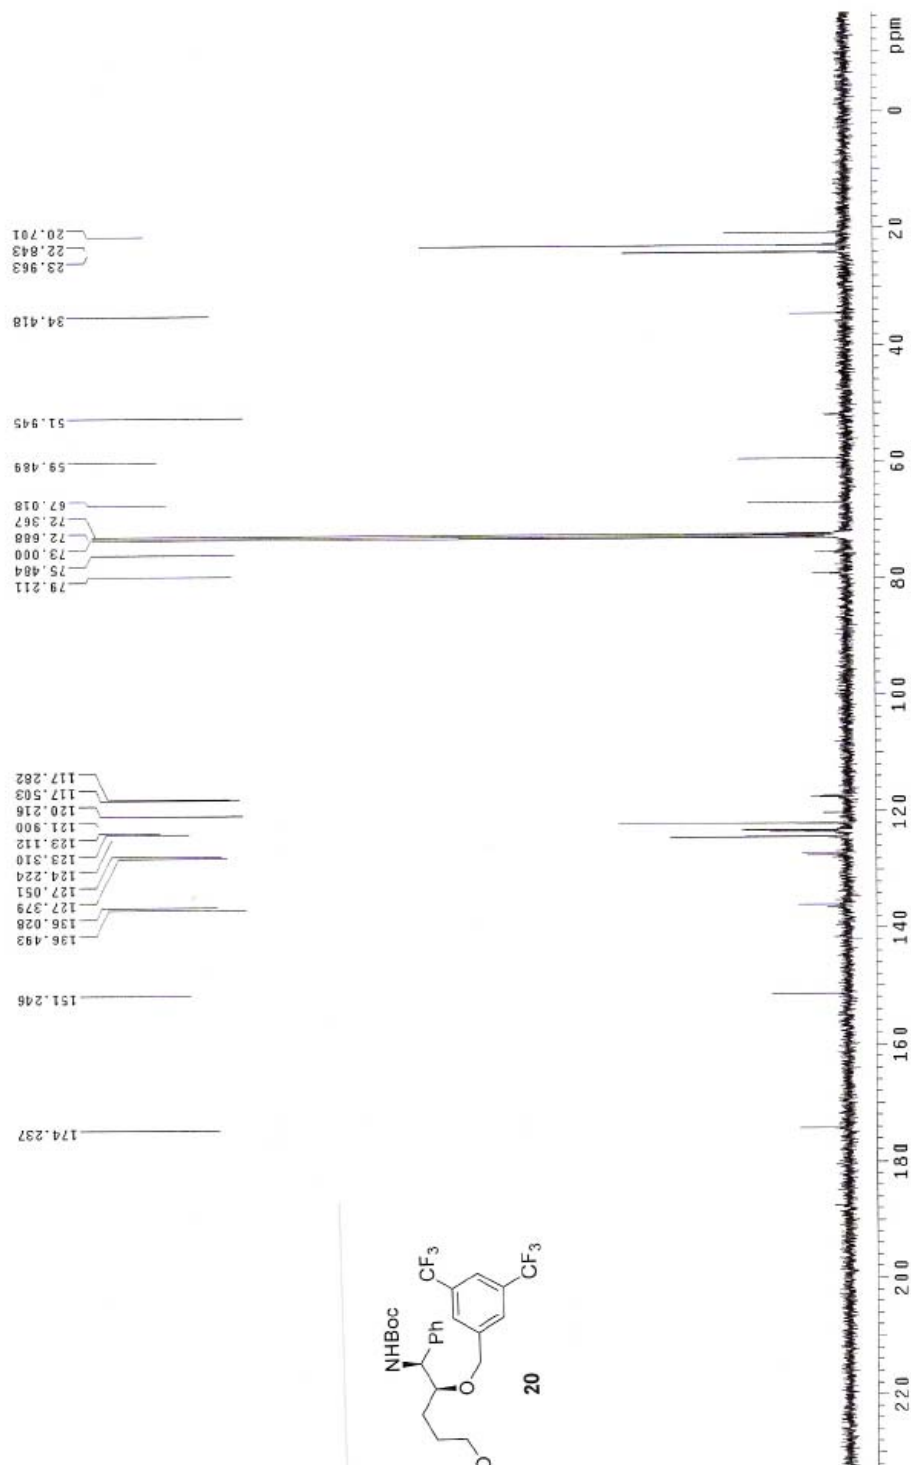

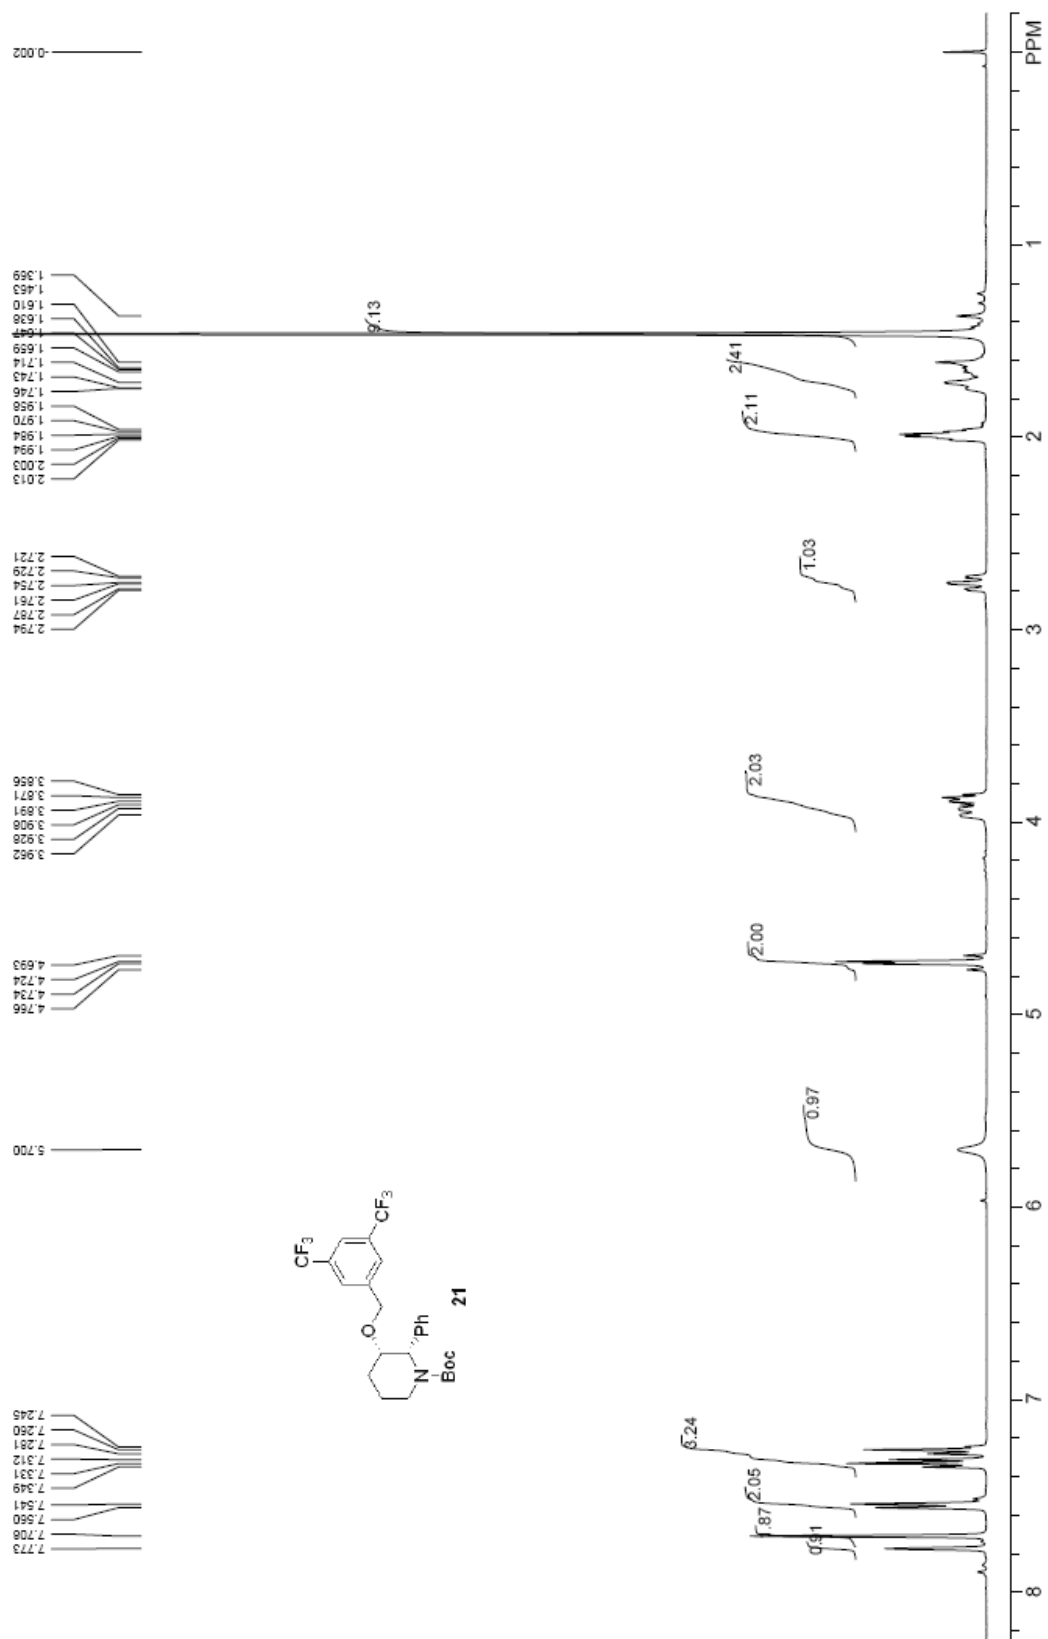

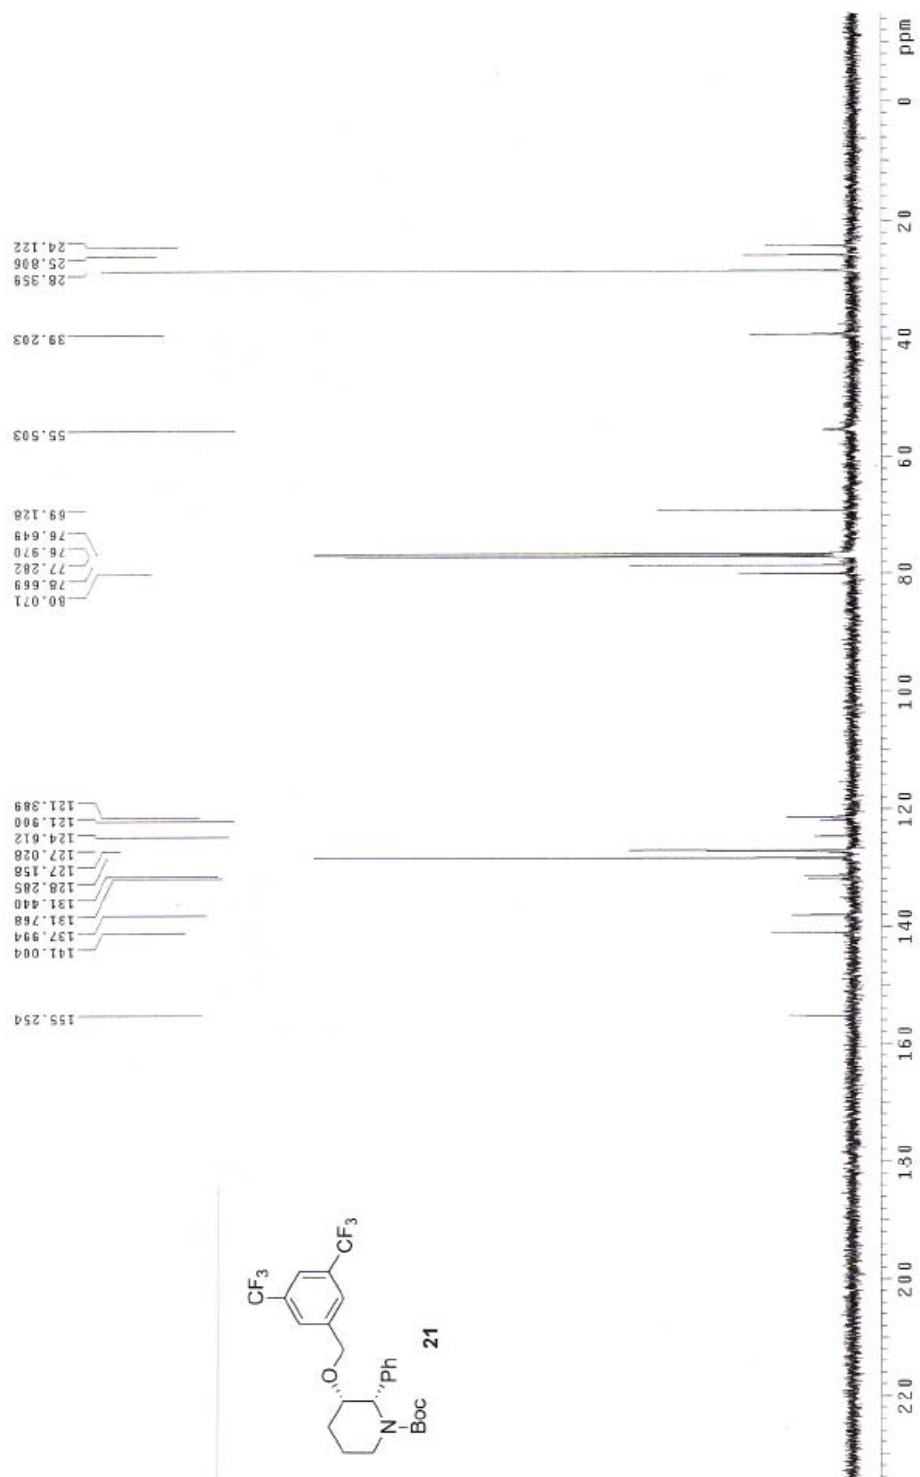

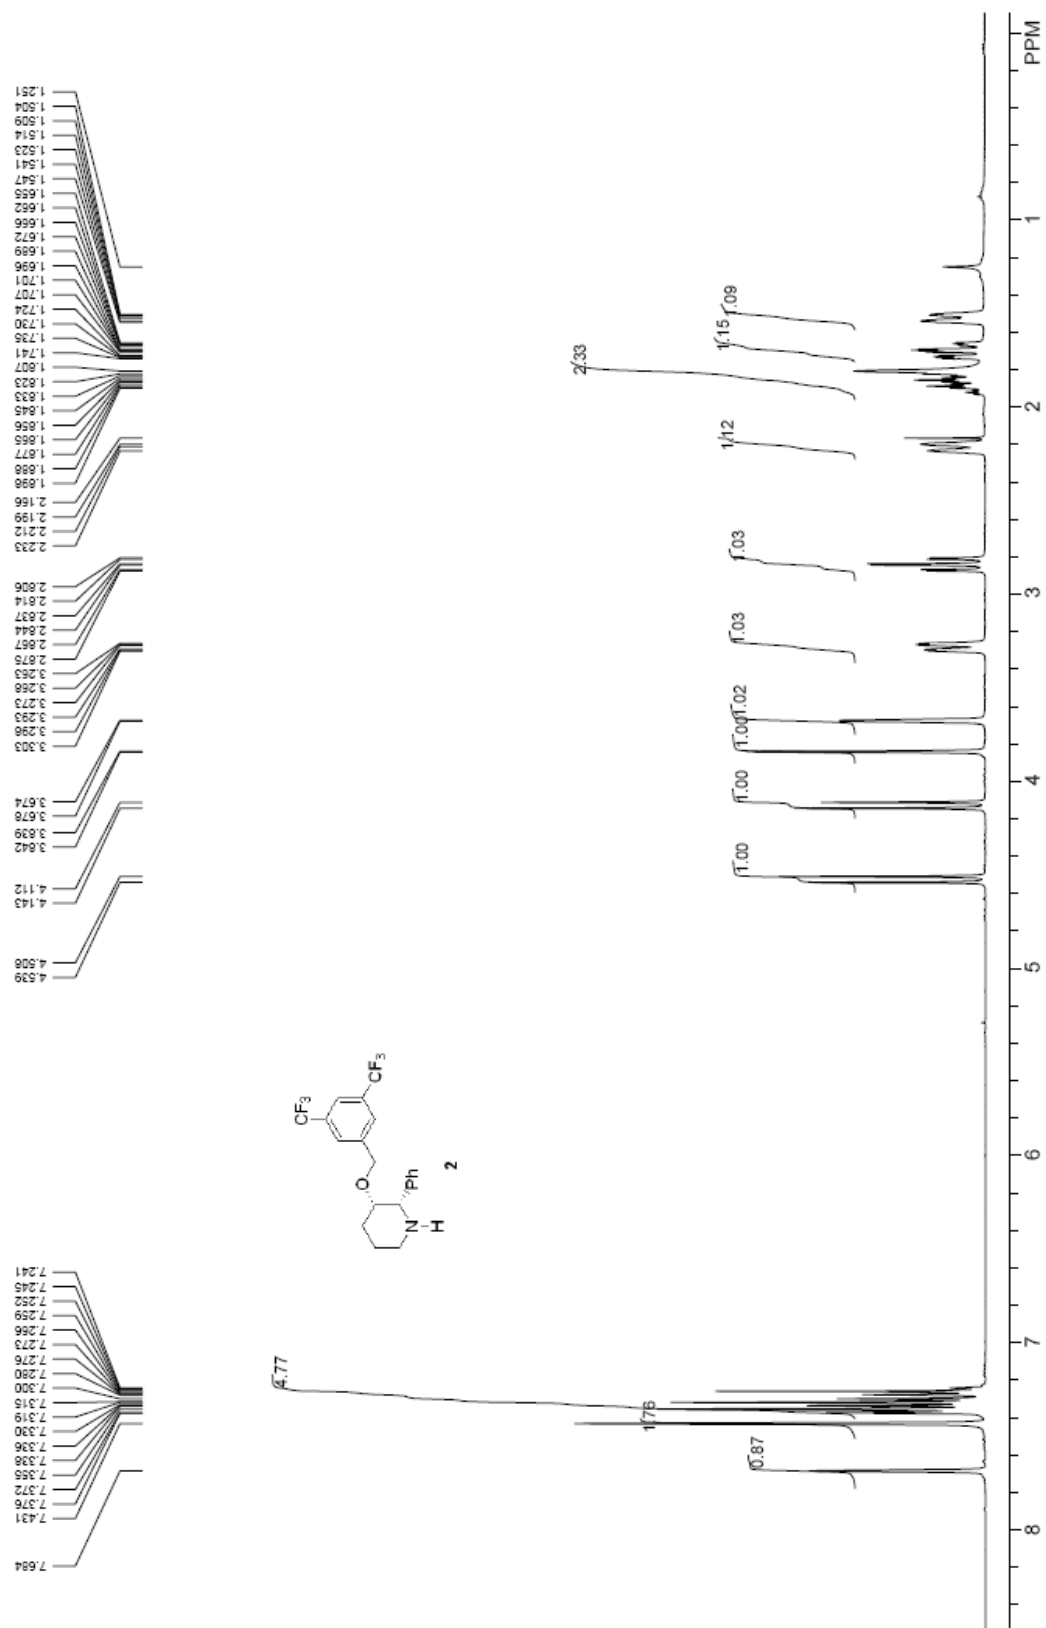

LRH-3-59-1a C13-CDCl3 071204

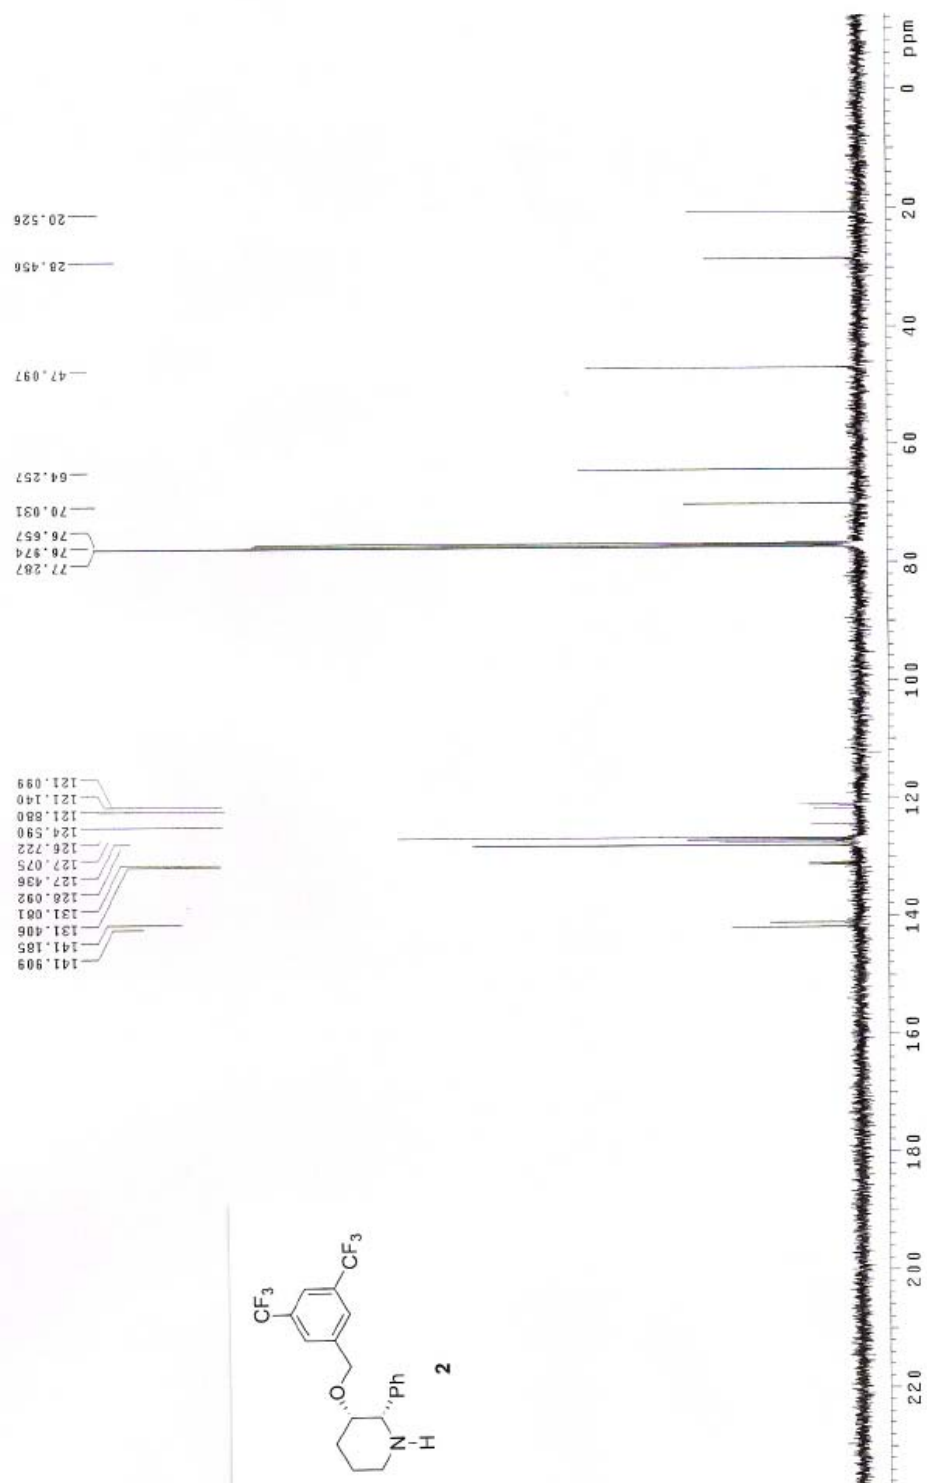

Supplement: Supplementary file 1 [file 4642807]
